# Supplementary material for: Construction of homogenized daily surface air temperature for Tianjin city during 1887–2019
Source: Copernicus journal article supplement (doi:10.5194/essd-2020-343), 2021-01-22
Supplement: Supplementary file [file essd-2020-343-AC1-supplement.pdf]

# 1 Construction of homogenized daily surface air 2 temperature for Tianjin city during 1887-2019

3 Peng Si<sup>1</sup>, Qingxiang Li<sup>2, 4</sup>, and Phil Jones<sup>3</sup>

4 <sup>1</sup> Tianjin Meteorological Information Center, Tianjin Meteorological Bureau, Tianjin, China

5 <sup>2</sup> School of Atmospheric Sciences, Sun Yat-sen University, Guangzhou, China

6 <sup>3</sup> Climatic Research Unit, School of Environmental Sciences, University of East Anglia, Norwich, UK

7 <sup>4</sup> Key Laboratory of Tropical Atmosphere-Ocean System (Sun Yat-sen University), Ministry of Education, and  
8 Southern Laboratory of Ocean Science and Engineering (Guangdong Zhuhai), Zhuhai, China

9  
10  
11  
12  
13 Submitted to *Earth System Science Data*

14 *Nov 2020*

15  
16  
17  
18  
19  
20 **\*Corresponding author:**

21 Prof. Qingxiang Li

22 School of Atmospheric Sciences

23 Sun Yat-Sen University

24 Tangjiawan, Zhuhai Campus of SYSU

25 Zhuhai, China, 519082

26 Tel/Fax: 86-756-3668352

27 E-Mail: liqingx5@mail.sysu.edu.cn

31 **Abstract.** The century-long continuous daily observations from some stations are important for the  
32 study of long-term trends and extreme climate events in the past. In this paper, three daily data sources:  
33 (1) Department of Industry Agency of British Concession in Tianjin covering Sep 1 1890-Dec 31 1931  
34 (2) Water Conservancy Commission of North China covering Jan 1 1932-Dec 31 1950 and (3) monthly  
35 journal sheets for Tianjin surface meteorological observation records covering Jan 1 1951-Dec 31 2019  
36 have been collected from the Tianjin Meteorological Archive. The completed daily maximum and  
37 minimum temperature series for Tianjin from Jan 1 1887 (Sep 1 1890 for minimum) to Dec 31 2019 has  
38 been constructed and assessed for quality control and an early extension from 1890 to 1887. Several  
39 significant breakpoints are detected by the Penalized Maximal T-test (PMT) for the daily maximum and  
40 minimum time series using multiple reference series around Tianjin from monthly Berkeley Earth,  
41 CRUTS4.03 and GHCNV3 data. Using neighboring daily series the record has been homogenized with  
42 Quantile Matching (QM) adjustments. Based on the homogenized dataset, the warming trend in annual  
43 mean temperature in Tianjin averaged from the newly constructed daily maximum and minimum  
44 temperature is evaluated as  $0.154 \pm 0.013 \text{ } ^\circ\text{C decade}^{-1}$  during the last 130 years. Trends of temperature  
45 extremes in Tianjin are all significant at the 5% level, and have much more coincident change than those  
46 from the raw, with amplitudes of  $-1.454 \text{ d decade}^{-1}$ ,  $1.196 \text{ d decade}^{-1}$ ,  $-0.140 \text{ d decade}^{-1}$  and  $0.975 \text{ d}$   
47  $\text{decade}^{-1}$  for cold nights (TN10p), warm nights (TN90p), cold days (TX10p) and warm days (TX90p) at  
48 the annual scale. The adjusted daily maximum, minimum and mean surface air temperature dataset for  
49 Tianjin city presented here is publicly available at <https://doi.pangaea.de/10.1594/PANGAEA.924561>  
50 (Si and Li, 2020).

51

## 52 1 Introduction

53 Instrumental observation records at meteorological stations are the most widely used first-hand  
54 information about weather and climate change and variability. They have the advantages of [better](#)  
55 representativeness as well as accuracy compared to other data (Leeper et al., 2015; Dienst et al., 2017;  
56 Xu et al., 2018). The most representative long-term observational temperature datasets in the world since  
57 IPCC AR5 (2013) includes: Global Historical Climatology Network(GHCN)-monthly(GHCNm) dataset  
58 (Lawrimore et al., 2011; Menne et al., 2018), Climatic Research Unit (CRU) datasets (Jones et al., 2012;  
59 Harris et al., 2020), Goddard Institute for Space Studies (GISTEMP) dataset (Hansen et al., 2010;  
60 Lenssen et al., 2019) and Berkeley Earth Surface Temperature (BEST) (Rohde et al, 2013). Recently, in  
61 order to make up for the limited coverage and the potential regional variability of data quality of current  
62 global climate datasets, Xu et al. (2018) has developed a new dataset of integrated and homogenized  
63 global land surface air temperature-monthly (C-LSAT). This has been updated to C-LSAT2.0, with the  
64 data extended to the period 1850-2019 (Li et al., 2020a; 2020b). These datasets were all developed at the  
65 monthly scale based upon meteorological station records from different continents over the world  
66 through the integration of different data sources, quality control of climate outliers, time and space  
67 consistency, and the analysis of data homogenization. The Global Historical Climatology Network-daily  
68 (GHCNd) dataset has also been developed, to meet the needs of climate analysis and monitoring  
69 research, but about two-thirds of the stations contributing to this dataset report precipitation only. In  
70 addition, GHCNd dataset has not been homogenized for artifacts due to changes in reporting practice at  
71 different times at particular stations (i.e., systematic biases), although the entire dataset has been quality  
72 controlled (Menne et al., 2012).

73 Chinese scholars, since the 1980s, have also carried out many studies on the establishment of  
74 long-term observational time series in China, but they often mainly used tree rings, ice cores, historical  
75 materials and other proxy data as part of the restoration of time series before the 1950 (the founding of  
76 the People's Republic of China) (Wang et al., 1998; 2000; Zheng et al., 2015; Yu et al., 2018). The

77 results based on these data are of great significance as they reveal the characteristics of climate  
78 periodicity and multi-scale changes over the past hundred years, but they are insufficient to meet the  
79 needs of quantitative monitoring and detection of long-term extreme climate events. In particular, there  
80 are many limitations when homogenizing the time series before the 1950s (including the establishment  
81 of reference series) such as the lack of continuous observational data, detailed and reliable metadata  
82 information, leading to the increase of uncertainties for regional and/or local climate analysis (Li et al.,  
83 2020c). As a result there still exists many uncertainties in the characteristics of climate change from the  
84 19<sup>th</sup> century to the mid-20th century (Li et al., 2010; 2017; Sun et al., 2017; Cao et al., 2017).

85        Since daily time series generally contain many more observations than monthly or annual series,  
86 daily analyses potentially have greater precision. As a result they are more useful in climate trend and  
87 variability studies, especially for extreme events (Vincent et al., 2012; Xu et al., 2013; Trewin, 2013;  
88 Hewaarachchi et al., 2017). However, due to difficulties in collecting and/or receiving daily data all over  
89 the world as well as non-climatic effects such as changes in observation times, there are numerous issues.  
90 For example, observations from temperature sites at principal stations in Canada were changed to be  
91 read at 0000UTC to 0600UTC (Vincent et al., 2002), making it is very difficult to form a global daily  
92 data product at century-long scales. This makes it extremely difficult to study global and/or regional  
93 extreme events over the past hundred years, especially before 1950. For some regional areas, daily  
94 instrumental observations may be extended to the 19<sup>th</sup> century and hence they are more valuable. Png et  
95 al. (2020) has compiled 463,530 instrumental observations of daily temperature, precipitation and  
96 sunshine from 319 stations distributed over China during 1912-1951 mostly from the source of monthly  
97 reports from the Institute of Meteorology, Nanjing; observatories over Japan-occupied Manchuria and  
98 the Japanese Army for North China. Since this is a daily data, it is immensely useful for the analysis of  
99 mesoscale and sub-seasonal climate variations. Although the earliest instrumental observations in China  
100 began in the 1840s, observations at some sites were interrupted during 1940s due to wars (e.g. the War  
101 of Resistance Against Japan and the War of Liberation) and hence many pieces of information have

102 likely been lost. Studies of the rescuing, processing and constructing complete and continuous daily site  
103 data over China are somewhat rare.

104 Due to the historic reasons of leased territory in China, some local single sites often have multiple  
105 observational sources before 1950. For example, for Qingdao, monthly surface air temperature series  
106 during 1899 - 2014 have been constructed based on newly digitized and homogenized observations from  
107 the German National Meteorological Service from 1899 to 1913 (Li et al., 2018). Tianjin meteorological  
108 station is one of the typical stations with more than one hundred years of observed climate data in China  
109 (Yan et al., 2001; Si et al., 2017). This station also has multi-source observations before 1950 as  
110 observed at some other meteorological stations in China having century-long datasets. Thus, considering  
111 Tianjin station as an example, this paper aims to construct a new daily instrumental maximum and  
112 minimum temperature series on the century scale in China, through integration, quality control,  
113 extension and homogenization of the multiple daily observations. The newly constructed daily  
114 temperatures in Tianjin provide relatively longer, more complete and reliable climate series for studies of  
115 climate and extreme climate change over century-long scales.

116 The remainder of this paper is arranged as follows: Section 2 describes the station histories from  
117 Tianjin. The basic data and reference data sources and their pre-processing are introduced in section 3.  
118 Section 4 introduces the procedures of constructing new daily maximum and minimum temperature  
119 series. Section 5 presents average and extreme temperature trend change based on newly constructed  
120 series. The availability of the resulting dataset (Si and Li, 2020) is reported in section 6, and summary of  
121 results and some discussion are given in section 7.

## 122 **2 Historical evolution of Tianjin meteorological observation station**

123 Wu (2007) showed that Tianjin meteorological observation station was under the control of the  
124 Department of Industry Agency of [the](#) British Concession in Tianjin covering September 1887 to  
125 December 1941. During the period from September 1904 to December 1949, it was co-ordinated by

126 many departments, such as Japan Central Meteorological Station, Central Meteorological Bureau of the  
 127 Republic of China, Aviation Department of North China Military Region of the People's Liberation  
 128 Army (PLA), Shunzhi Water Conservancy Commission, Water Conservancy Commission of North  
 129 China and Water Conservancy Engineering Bureau of North China. However, only the records of daily  
 130 maximum and minimum temperatures from Department of Industry Agency of the British Concession in  
 131 Tianjin (Fig.1a-b) and Water Conservancy Commission of North China (Fig.1c) have been collected by  
 132 the Tianjin Meteorological Archive. Each of these is continuous and complete, and most importantly  
 133 they can be connected to each other on 1 Jan 1932 without overlapping, thereby forming a complete and  
 134 continuous time series before 1950.

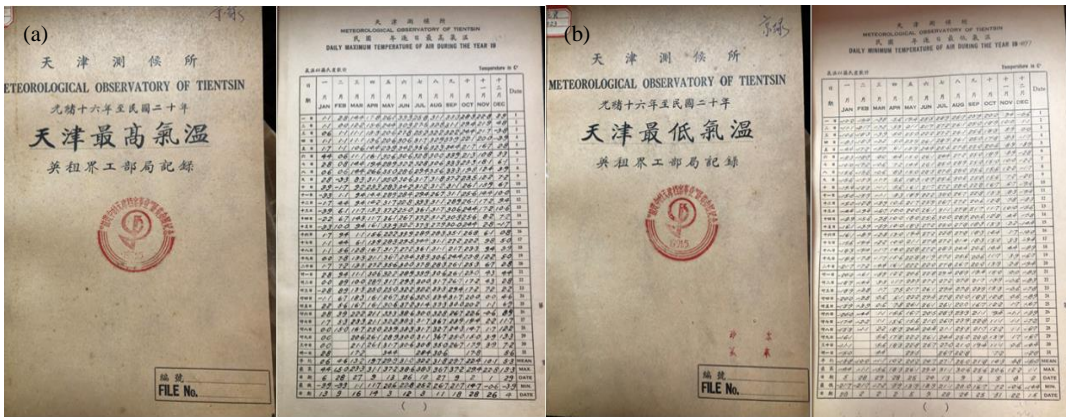

135

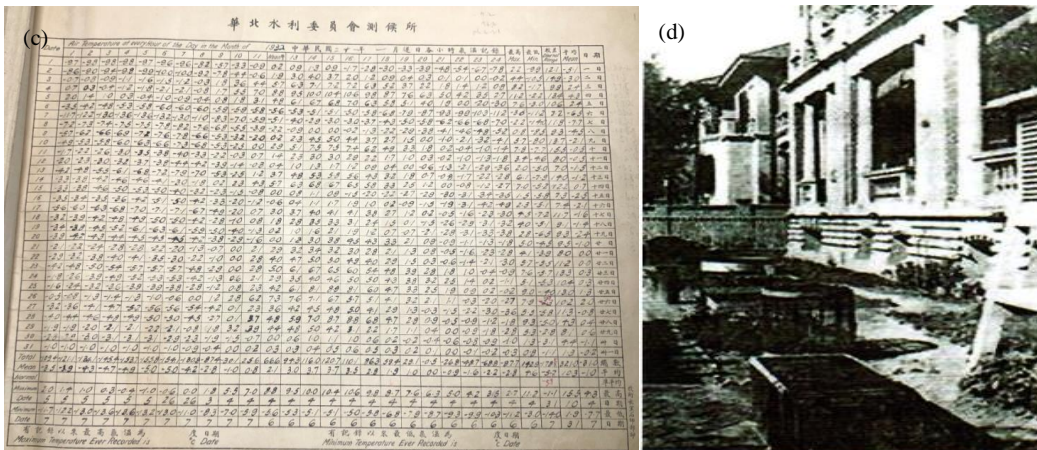

136

137 **Figure 1.** The handwritten observation records of Tianjin before 1950, (a) and (b) for records of maximum and  
138 minimum temperatures from Department of Industry Agency of British Concession in Tianjin, (c) for records from  
139 Water Conservancy Commission of North China, and Tianjin Observatory at No. 22 Ziyou Road (d). These  
140 photographs were provided by Tianjin Meteorological Archive, Tianjin Meteorological Bureau.

141 The daily temperature records at Tianjin meteorological observation station that we have accessed  
142 begin with Sep 1 1890 collected by Tianjin Meteorological Archive (Fig.1a-c). The metadata history of  
143 the Tianjin observation station during Sep 1 1890 - Dec 31 2019 is listed in Table 1. The history is sorted  
144 according to the Surface Meteorological Observation Specifications in China (versions of 1950, 1954,  
145 1964, 1979, and 2003), metadata of China surface meteorological station and journal sheets of Tianjin  
146 surface meteorological records. Changes to observational times have been marked on the original time  
147 series of maximum and minimum temperatures for Tianjin city (see Fig. 2). As shown in Table 1, Tianjin  
148 observation station has relocated four times since 1890, several times in 1921 (Fig. 1d), Jan 1 1955, Jan  
149 1 1992, and Jan 1 2010 without prominent changes in elevations. The environment surroundings of  
150 Tianjin station changed from urban to suburban in 1955, accompanied by a number of instrument  
151 changes. In this period, changes to the instrument manufacturer have happened four times for both  
152 maximum and minimum temperature series, as well as changes of automatic observation instead of  
153 manual observation in 2004 and a new generation replacement of last automatic instrument in 2014. In  
154 documented metadata (Table 1), there have been changes of observing time four times for both  
155 maximum and minimum temperatures since 1951, but they were always recorded over a 24-hour  
156 observational window at Beijing Time (BT) or similar to BT (as for the period of Jan 1 1954 - Dec 31  
157 1960). Moreover, it is important to mention here that since 1951 there were two stations viz., Tianjin and  
158 Xiqing collocated in the Tianjin area. Due to rapid urbanization at the surrounding environmental Tianjin  
159 area, the old Tianjin site gradually becomes less representative as a climate observation station and  
160 therefore since Jan 1 1992 afterwards, observations at Xiqing station are used to replace the old Tianjin

161 station. This can also be considered as Tianjin station being relocated to Xiqing station since then.

162 **Table 1.** The history logs at Tianjin meteorological observation station during Sep 1 1890 - Dec 31 2019.

| Periods                 | Latitude | Longitude | Altitude (m) | Address<br>(Surrounding<br>environment)                             | Relocation<br>description             | Instrument<br>change                                                             | Observing<br>time              |
|-------------------------|----------|-----------|--------------|---------------------------------------------------------------------|---------------------------------------|----------------------------------------------------------------------------------|--------------------------------|
| 1890.9.1—<br>1921       | 39°07'   | 117°12'   | unspecified  | unspecified                                                         | —                                     | unspecified                                                                      | unspecified                    |
| 1921—<br>1950.12.31     | 39°08'   | 117°11'   | 6.0          | No. 22 Ziyou<br>Road, The Third<br>Distribution,<br>Tianjin (urban) | unspecified                           | unspecified                                                                      | unspecified                    |
| 1951.1.1—<br>1953.12.31 | 39°08'   | 117°11'   | 6.0          | Same as above                                                       | —                                     | —                                                                                | Tmax<br>18:00<br>Tmin<br>09:00 |
| 1954.1.1—<br>1954.12.31 | 39°08'   | 117°11'   | 6.0          | Same as above                                                       | —                                     | 1954.1.1<br>Tmin<br>1954.1.1                                                     | unspecified                    |
| 1955.1.1—<br>1960.12.31 | 39°06'   | 117°10'   | 3.3          | Zunyi Road,<br>Hexi<br>Distribution,<br>Tianjin<br>(suburban)       | 5 km north of<br>the original<br>site | —                                                                                | unspecified                    |
| 1961.1.1—<br>1991.12.31 | 39°06'   | 117°10'   | 3.3          | Qixiangtai Road,<br>Hexi<br>Distribution,<br>Tianjin<br>(suburban)  | —                                     | 1961.1.1;<br>1973.1.1;<br>1989.1.1<br>Tmin<br>1961.1.1;<br>1966.1.1;<br>1989.1.1 | 20:00                          |



| Xidawa, Xiqing          |        |         |     |                                                                  |                                              |                                                            |                                        |
|-------------------------|--------|---------|-----|------------------------------------------------------------------|----------------------------------------------|------------------------------------------------------------|----------------------------------------|
| 1992.1.1—<br>2003.12.31 | 39°05' | 117°04' | 2.5 | Distribution,<br>Tianjin<br>(suburban)                           | unspecified                                  | —                                                          | 20:00                                  |
| 2004.1.1—<br>2009.12.31 | 39°05' | 117°04' | 2.5 | Same as above                                                    | —                                            | automatic<br>observation                                   | pick up from<br>timing<br>minutes data |
| 2010.1.1—<br>2013.12.31 | 39°05' | 117°03' | 3.5 | Jingfu Road,<br>Xiqing<br>Distribution,<br>Tianjin<br>(suburban) | 1.5km<br>southwest of<br>the site in<br>1992 | automatic<br>observation                                   | pick up from<br>timing<br>minutes data |
| 2014.1.1 to<br>now      | 39°05' | 117°03' | 3.5 | Same as above                                                    | —                                            | new generation<br>of automatic<br>observation<br>equipment | pick up from<br>timing<br>minutes data |

163 The straight line (—) indicates no change. The observing time is at Beijing Time (BT). Tmax and Tmin indicate the  
 164 maximum and minimum temperature, respectively.

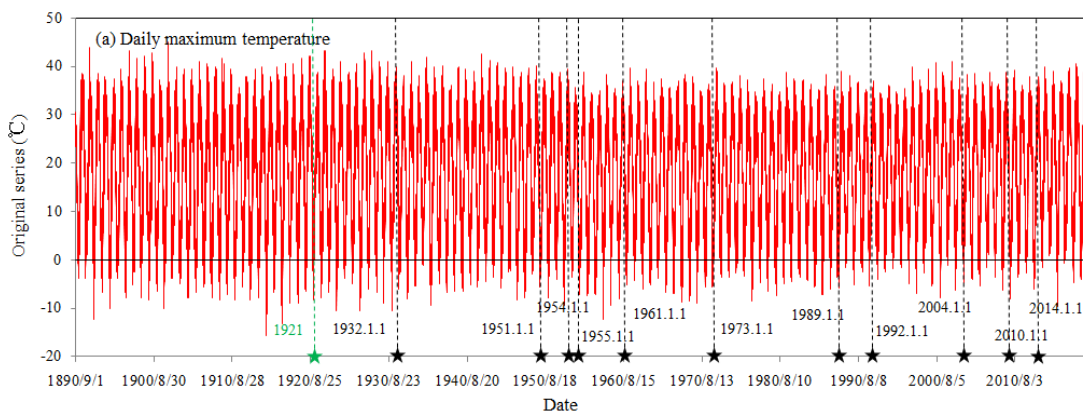

165

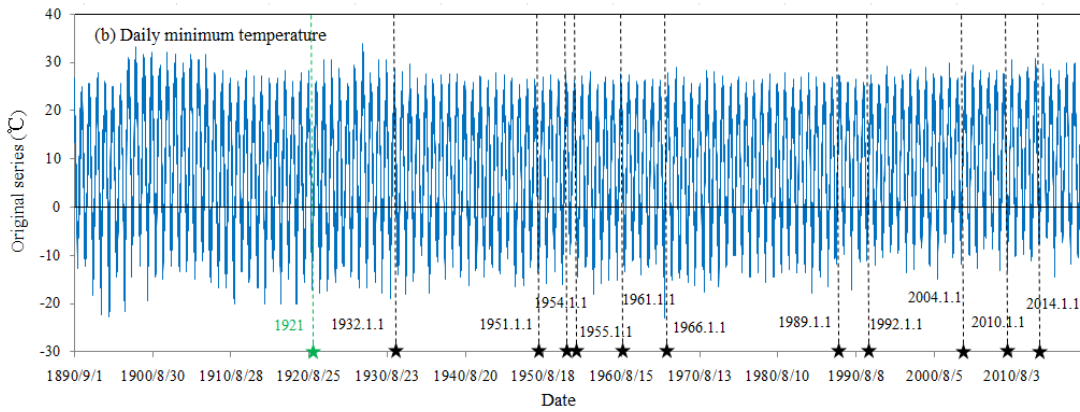

166

167 **Figure 2.** Original series of daily maximum temperature (a) and minimum temperature (b) at Tianjin meteorological  
 168 observation station covering Sep 1 1890 - Dec 31 2019. Black stars with vertical dashed lines on the axes mark  
 169 metadata times (The relocation point in 1921 is marked by green star with vertical dashed line due to no specific date).

### 170 3 Data sources

#### 171 3.1 Original data and preliminary quality control

172 Based on the analyses of metadata history at Tianjin station discussed in section 2, this paper selects  
 173 three observation temperature data sources collected by Tianjin Meteorological Archive as the basic data  
 174 to construct the daily maximum and minimum temperature time series at Tianjin station from 1890 (Fig.  
 175 2). These are the daily observation records from (1) Department of Industry Agency of British  
 176 Concession in Tianjin covering Sep 1 1890 - Dec 31 1931; (2) Water Conservancy Commission of North  
 177 China during Jan 1 1932 - Dec 31 1950; and (3) monthly journal sheets of Tianjin surface  
 178 meteorological observation records covering Jan 1 1951 - Dec 31 2019. Since there are no missing data  
 179 and overlap for each of the three daily sources, the three daily data resources are directly spliced into a  
 180 complete time series. However, in view of the regime changes of operation and different station numbers  
 181 between Tianjin station and Xiqing station that happened at Jan 1 1992 (Table 1), the daily records from  
 182 Jan 1 1951 to Dec 31 1991 observed in the Hexi area and those observed at Xiqing area from Jan 1 1992  
 183 to Dec 31 2019 are used to form the basic daily time series from Jan 1 1951 to Dec 31 2019 for the long

184 series.

185 A preliminary quality control procedure consisting of multiple steps was carried out on the original  
186 integrated daily time series of maximum and minimum temperature from Sep 1 1890 to Dec 31 2019 at  
187 Tianjin to remove any errors caused by manual observations, instrument malfunctions and digital inputs.  
188 Firstly, the range of the daily maximum or minimum temperature was scrutinized for magnitude beyond  
189 the limit of 60 °C and -80 °C as errors. Fortunately, both the series have no such error. Secondly based  
190 on anomalies from the 1961-1990 as reference period, climatic outliers of maximum and minimum  
191 temperature are assessed considering a magnitude exceeding five standard deviations of their monthly  
192 anomalies as outliers during 1890-2019. There is no outlier found in our validation. Finally, internal  
193 consistency is investigated by checking if there is any minimum temperature data greater than or equal  
194 to the maximum at the same date and no such inconsistencies were found. It is important to mention that  
195 there is a sudden rise in annual minimum temperature series during the year 1927 even after these three  
196 checks. The offsets of the discontinuities in 1927 compared with averages for the two sections before  
197 and after it are 4.2 °C and 3.4 °C, respectively. We repeated the steps of outlier checks once by  
198 reviewing the earlier condition with three times the standard deviation of monthly anomalies. Results  
199 indicate that most of the daily minimum data for April to October 1927 exceed the current condition and  
200 finally the data during this period so were set to missing values. Even though, the quality of original  
201 daily maximum and minimum temperatures during 1890 - 2019 at Tianjin station is good, these checks  
202 provide a good foundation for the subsequent construction of a reliable homogenized daily series.

### 203 **3.2 Reference data**

204 Wu (2007) documented that although the earliest surface observation records at Tianjin station start with  
205 the year 1887, the observed daily maximum and minimum temperatures collected by Tianjin

206 Meteorological Archive began with September 1890 (Fig. 2). Therefore, some additional reference data  
207 sources are selected to extend the daily temperature series from January 1887 to August 1890 and  
208 lengthen the established daily temperature data to as early as possible. In addition, it is extremely  
209 important to establish an objective as well as a reasonable reference series for data homogenization. But  
210 due to non-availability of observation records and station metadata before 1950 especially for daily data,  
211 it is impossible to find a complete and reliable observed temperature series as a reliable reference series  
212 for Tianjin. Based on few recently reported studies (Li et al., 2020a; Lenssen et al., 2019; Xu et al., 2018;  
213 and Menne et al., 2018), we employ the station series or the interpolated temperature series using  
214 neighboring grid boxes from three global land surface temperature observation series (Table 2) as  
215 reference data sources for extension and establishment of reference data series used in data  
216 homogenization at Tianjin station. Plots of the ‘Tianjin’ station from all three series are shown in Figure  
217 3. The three global Land Surface Temperature (LSAT) are (1) Berkeley Earth land temperature  
218 (Berkeley Earth; Rohde et al., 2013; <http://berkeleyearth.org/data/>); (2) Climatic Research Unit (CRU)  
219 Time-Series (TS) version 4.03 (CRUTS4.03; Harris et al., 2020;  
220 [http://data.ceda.ac.uk/badc/cru/data/cru\\_ts/cru\\_ts\\_4.03/data/](http://data.ceda.ac.uk/badc/cru/data/cru_ts/cru_ts_4.03/data/)) and (3) Global Historical Climatology  
221 Network (GHCN) version3 (GHCNV3; Lawrimore et al., 2011;  
222 <https://www.ncdc.noaa.gov/ghcn-d-data-access>).

223 The selected three LSAT are not independent as they likely use common input observations. The  
224 multiple datasets provides a variety of useful checks because they employ different ways of handling  
225 data problems such as incomplete spatial and temporal coverage and non-climatic influences on  
226 meteorological measurement (Hansen et al., 2010). As shown in Table 2, the three LSAT involve quality  
227 control and homogenization but using different methods. The records of Berkeley Earth were usually

228 split into portions occurring before and after known and presumed discontinuities (e.g., from station  
229 relocation or instrument changes) without adjustment. For CRUTS4.03, most of these data have been  
230 adjusted, because the ultimate sources of most station records are from National Meteorological Services  
231 (NMSs), so China Meteorological Administration (CMA) for Tianjin. GHCNV3 station data used in this  
232 paper are the quality controlled and adjusted (QCA) data, which were produced by the developers of  
233 GHCN-Monthly. Two types of grid data, CRUTS4.03 and Berkeley Earth are both interpolated to the  
234 site level using the bilinear method.

235 From Table 2, only Berkeley Earth daily maximum/minimum temperatures are available. So the  
236 maximum temperature Berkeley Earth-daily data corresponding to the site level Tianjin station is  
237 selected as the extension data for the period of Jan 1 1887-Aug 31 1890 (The specific information about  
238 extending the processing for this period is in supplemental material), and the daily minimum series still  
239 begins with the date on Sep 1 1890 due to scarcity of reference data sources.

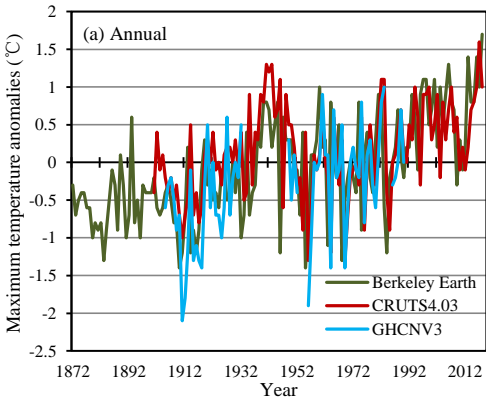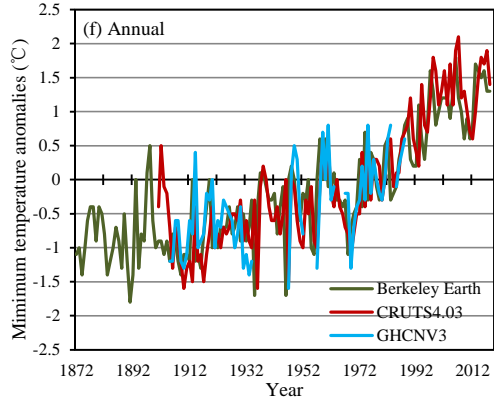

240

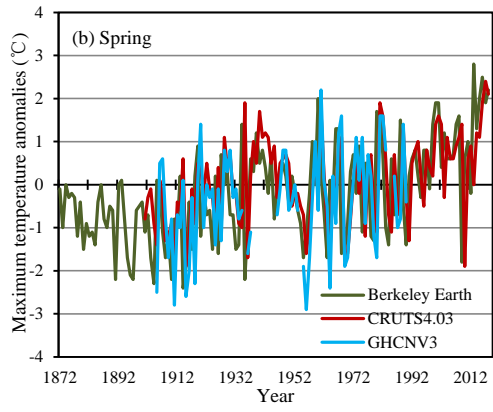

241

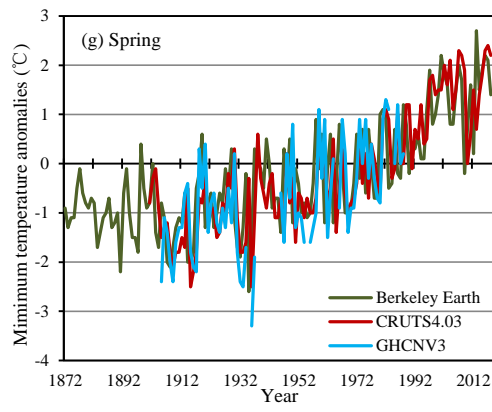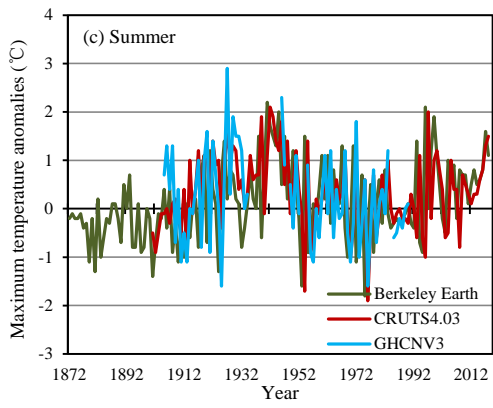

242

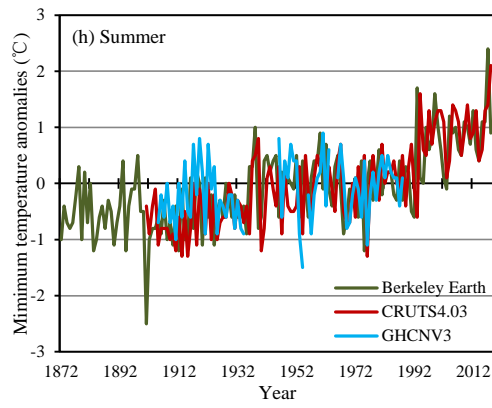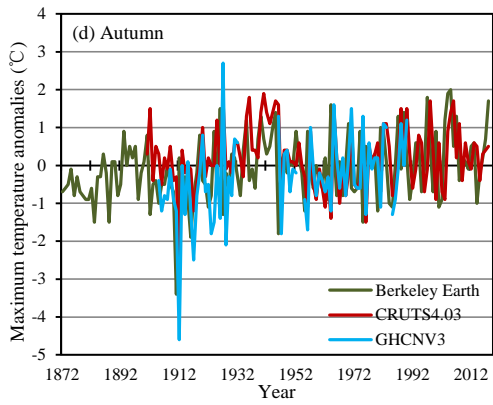

243

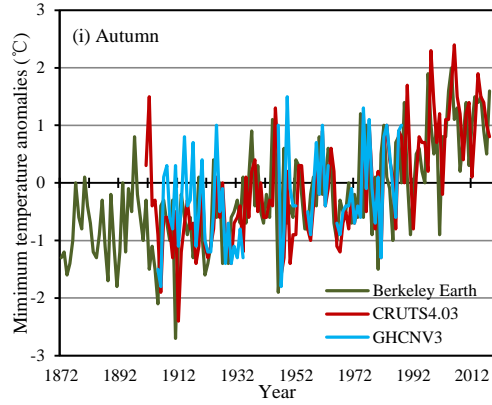

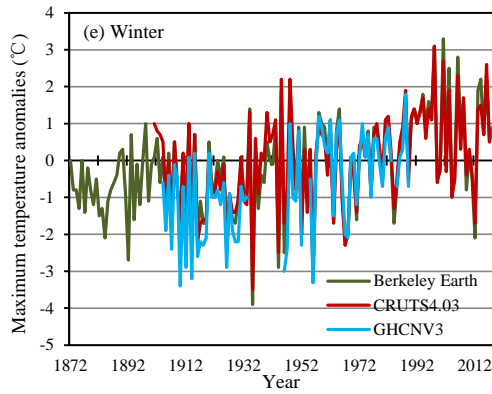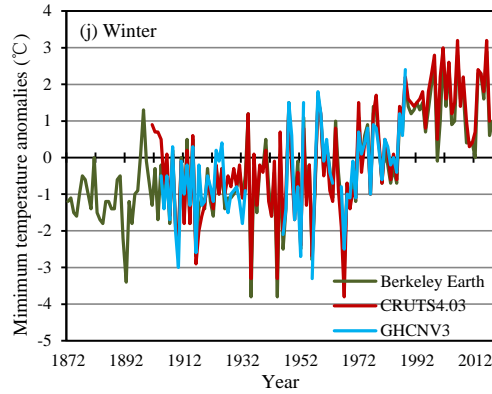

244

245 **Figure 3.** The annual and seasonal average anomalies of maximum (a-e) and minimum (f-j) temperatures based on the  
 246 interpolated series of Berkeley Earth and CRUTS4.03 and the station series of GHCNV3 for Tianjin station from  
 247 1961-1990 base period.

248 **Table 2.** Information of reference data sources.

| Data sources   | Monthly series | Daily series | Gridded data | Station data | Temporal resolution used here | Gridded or station data used here | Time periods                               | Units | Quality control | Adjustment |
|----------------|----------------|--------------|--------------|--------------|-------------------------------|-----------------------------------|--------------------------------------------|-------|-----------------|------------|
|                |                |              |              |              |                               |                                   | only for Tianjin in situ level             |       |                 |            |
| CRUTS4.03      | √              | ×            | √            | √            | monthly                       | 0.5°×0.5° gridded                 | 1901.1-2018.12                             | °C    | √               | √          |
| Berkeley Earth | √              | √            | √            | √            | monthly                       | 1°×1° gridded                     | 1872.12-2019.12                            | °C    |                 |            |
|                | √              | √            | √            | ×            | daily                         | 1°×1° gridded                     | Tmax1880.1-2018.12<br>/ Tmin1903.1-2018.12 | °C    | √               | ×          |
| GHCNV3         | √              | √            | √            | √            | monthly                       | station data                      | 1904.1-1990.12                             | °C    | √               | √          |

249 **4 Construction of daily maximum and minimum temperature series from 1887 to 2019**

250 On the basis of the quality controlled and the extended series, the daily homogenized maximum and  
 251 minimum observation temperature series in Tianjin were constructed by means of the flow chart  
 252 illustrated in the dashed-box part of Fig. 4. Homogenization is an important step to eliminate the  
 253 discontinuities in observation records induced by non-climatic influences such as station relocation,  
 254 instrument change, observing time change and so on. Most importantly, the true characteristics of  
 255 climate change are preserved in this process (Quayle et al., 1991; Della-Marta and Wanner, 2006;  
 256 Haimberger et al., 2012; Rahimzadeh and Zavareh, 2014; Hewaarachchi et al., 2017).

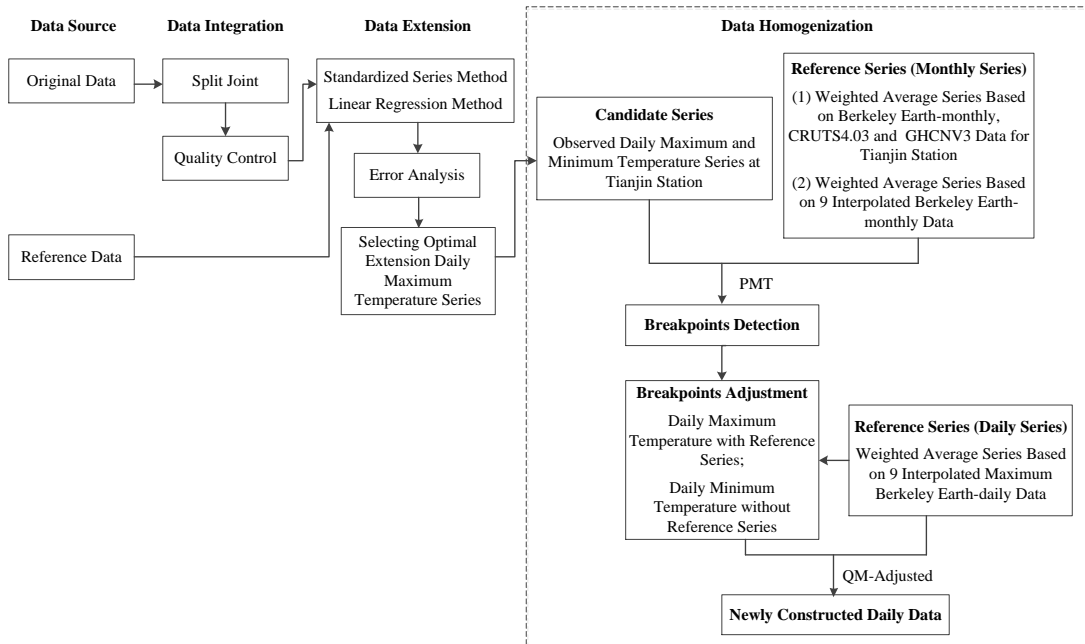

**Figure 4.** The flow chart of construction for century-long daily maximum and minimum temperature series in Tianjin.

#### 4.1 Establishment of the reference series

In the process of homogenization, reasonable reference series plays an important role in the reliability of the detected breakpoints. So in this section, we will establish monthly and daily reference series for the maximum or minimum temperature series at Tianjin station and use them for breakpoint detection and adjustment, respectively. Both reference series are established using a weighted average method. For monthly reference series, we will establish two types in order to make the detected breakpoints more reasonable and reliable. First, reference data are based on the combination of the interpolated temperature series from Berkeley Earth-monthly and CRUTS4.03 and station series from GHCNV3 data for Tianjin site (the three global LSAT datasets) and secondly based on the interpolated temperature series from Berkeley Earth-monthly data only. From the three LSAT data, the weight coefficients are the square of the correlation coefficients between each LSAT and Tianjin's observed data. The daily



270 reference series we use is based on the interpolated temperature series from Berkeley Earth-daily data  
271 only.

272 In the case of the interpolated temperature series from Berkeley Earth-monthly or daily data only,  
273 the site level data are derived from the station network across the Beijing-Tianjin-Hebei area in China  
274 (Fig. 5). These stations are selected as follows: Firstly, the potential stations less than 300km at  
275 horizontal distances around Tianjin station and with altitude differences within 200m are chosen;  
276 Secondly, we will select 10 stations those are closest to Tianjin station using a spherical distance; Finally,  
277 9 stations are confirmed which are consistent between step 1 and step 2. In Figure 5 (the right), these 9  
278 are identified by green solid circles with black or red stars. Thus, the interpolated temperature series  
279 from Berkeley Earth-monthly or daily reference series are generated using the weighted average of the 9  
280 stations. These weights are calculated as the square of correlation coefficients between the interpolated  
281 temperature series from Berkeley Earth-monthly or daily data for each 9 stations and Tianjin's observed  
282 data. Recall also that, the missing values in the original daily minimum temperature at Tianjin for April  
283 to October 1927 (checked in section 3.1) were replaced by the corresponding data from the weighted 9  
284 interpolated temperature series from Berkeley-daily data.

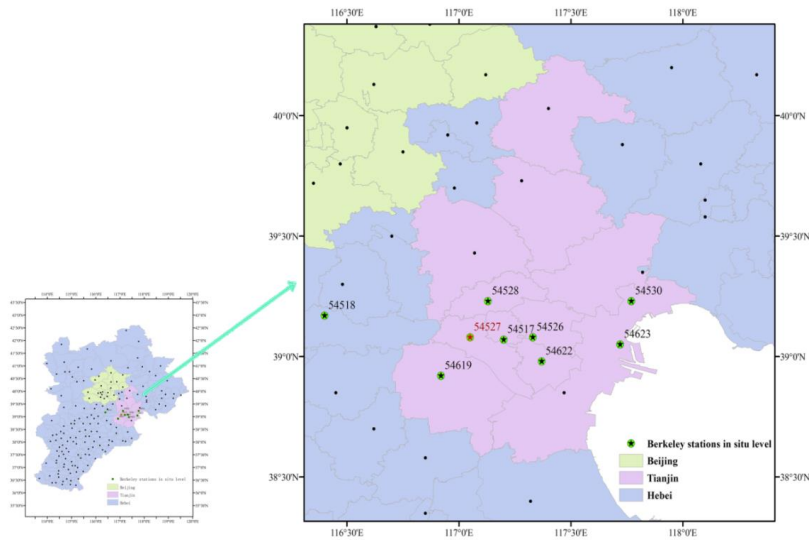

285

286 **Figure 5.** Geographical distribution of the surface observation-weather stations (black solid circles) at  
 287 Beijing-Tianjin-Hebei area in China and the selected 9 stations (green solid circles with black or red stars).

288 **4.2 Breakpoints detection and adjustment**

289 The RHtestsV4 software package is used to homogenize the daily maximum and minimum temperature  
 290 data at Tianjin station. The software consists of the Penalized Maximal T-test (PMT) (Wang et al., 2007)  
 291 and Quantile Matching (QM) adjustment (Wang et al., 2010; [Bai et al., 2020](#); [Lv et al., 2020](#)), both of  
 292 which are used to detect and adjust the known or presumed discontinuities. As observed in earlier  
 293 reported studies (Vincent, 2012; Trewin, 2013; Xu et al., 2013), homogenization at the daily timescales  
 294 is much more challenging than that at monthly or annual scales. Thus, firstly we test Tianjin's monthly  
 295 observed maximum and minimum temperature series averaged from the daily ones to find the significant  
 296 breakpoints by means of PMT at the 5% significance level using two types of monthly reference series.  
 297 We then adjust the daily series at Tianjin station by QM-adjustment with or without the daily reference  
 298 series.

299 The breakpoints in the segment before 1921 are mainly determined by objective judgment from the

300 same shifts at the two monthly timescales simultaneously due to the scarcity of station metadata. Those  
301 after 1921 are additionally assessed together with the station metadata and PMT detection at the 5%  
302 significance level. According to Table 1, we made a list containing some possibilities that could cause  
303 shifts in Tianjin's daily maximum and minimum temperature series (Fig. 2 vertical dashed lines). The  
304 date of Jan 1 1932 and Jan 1 1951 are connection points for different data sources, 1921, Jan 1 1955, Jan  
305 1 1992 and Jan 1 20~~10~~<sup>10+</sup> indicate station relocations, and the others are the times of instrument and/or  
306 observing time change. However, due to statistical non-significance, those potential discontinuities are  
307 not considered as the final discontinuities (Fig. 6). So potential dates do not always cause artificial  
308 discontinuities at the joining of the three observation segments for daily maximum or minimum  
309 temperature series. Also all the instrument changes that happened for maximum and minimum series  
310 have also not introduced any significant shifts. In this regard, they do not look like the changes that  
311 happened with other networks around the world, such as the U.S. Cooperative Observer Program  
312 (COOP) network (Leeper et al., 2015). Moreover, different observing times (including automated  
313 observation system) also do not introduce any significant biases to the temperature time series, since the  
314 daily maximum and minimum temperatures are always recorded over a 24-hour observational window.  
315 Additionally, various versions of the surface meteorological observation specifications in China (e.g.  
316 versions of 1950, 1954, 1964, 1979 and 2003) imply that the observation principles of the highest and  
317 lowest thermometers are consistent, although there were a number of alterations of observing times.

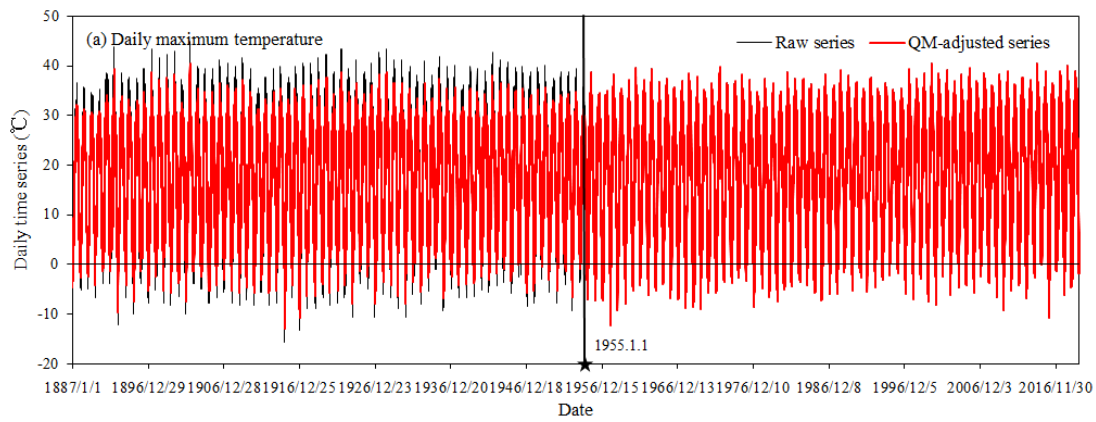

318

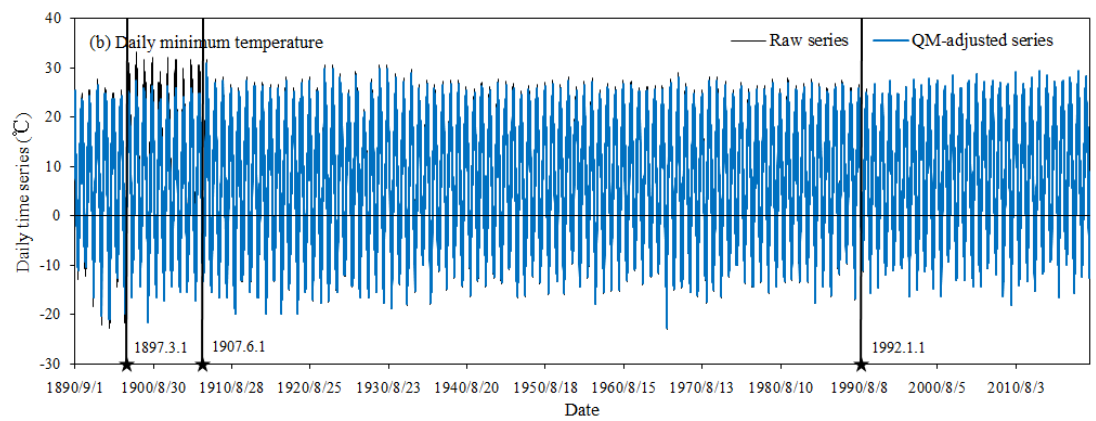

319

320 **Figure 6.** QM-adjusted and raw series (after quality control and extension) of daily maximum temperature (a) and  
 321 minimum temperature (b) at Tianjin meteorological observation station covering Jan 1 1887 (Sep 1 1890 for minimum)  
 322 to Dec 31 2019. Vertical solid lines demarcate the discontinuities at times Mar 1 1897, Jun 1 1907, Jan 1 1955 and Jan 1  
 323 1992.

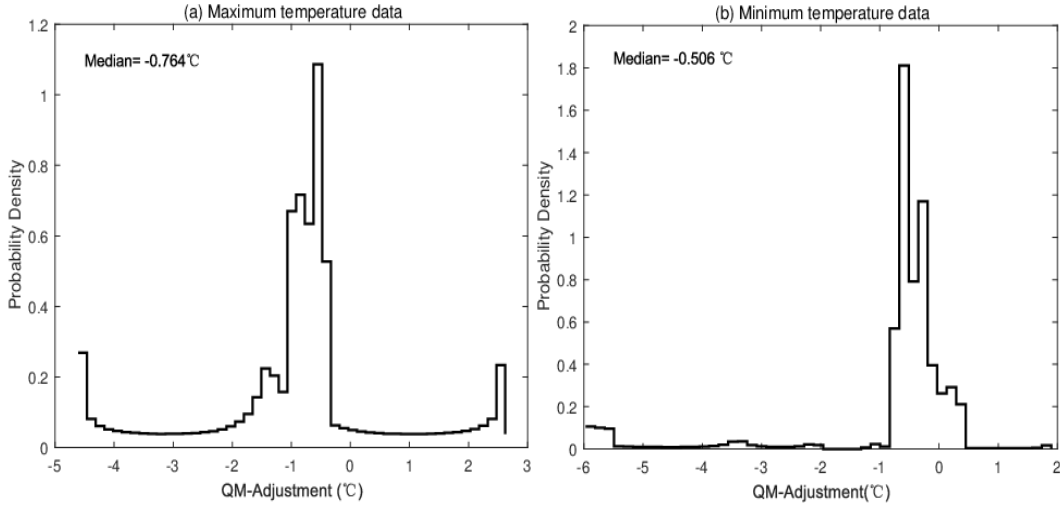

324  
325 **Figure 7.** The amplitudes of QM adjustment applied to daily maximum (a) and minimum (b) temperature data at  
326 Tianjin meteorological observation station.

327 **Table 3.** The average QM adjustments at the monthly timescales applied to daily maximum and minimum temperature  
328 data at Tianjin meteorological observation station (Units: °C).

|                     | Jan    | Feb    | Mar    | Apr    | May    | Jun    | Jul    | Aug    | Sep    | Oct    | Nov    | Dec    |
|---------------------|--------|--------|--------|--------|--------|--------|--------|--------|--------|--------|--------|--------|
| Maximum temperature | 1.136  | 0.246  | -0.616 | -0.687 | -1.322 | -2.484 | -2.817 | -2.285 | -1.046 | -0.590 | -0.582 | 0.566  |
| Minimum temperature | -0.105 | -0.297 | -0.634 | -0.979 | -1.084 | -1.090 | -1.207 | -1.184 | -1.050 | -0.951 | -0.624 | -0.317 |

329 Breakpoints in Mar 1 1897 and Jun 1 1907 are without metadata support, but those at Jan 1 1955  
330 and Jan 1 1992 are confirmed by metadata of station relocation. In Jan 1 1955 Tianjin meteorological  
331 station was relocated from No. 22 Ziyou Road to Zunyi Road, where is only 5km north of the original  
332 site, as well as being more open and clear, and in Jan 1 1992 it was relocated from Qixiangtai Road,  
333 Hexi District to Xidawa, Xiqing District (Table 1). The significant breakpoints are given in Fig. 6 as  
334 vertical solid lines.

335 The amplitudes of QM adjustment applied to each individual daily maximum and minimum  
336 temperature data are [-4.606, 2.621 °C] (Fig. 7a) and [-5.972, 1.897 °C] (Fig. 7b). The medians of QM

带格式的: 段落间距段前: 0 磅

337 adjustment are  $-0.764\text{ }^{\circ}\text{C}$  and  $-0.506\text{ }^{\circ}\text{C}$  respectively. As shown in Fig. 7, there are about 75% of  
338 adjustments are covering  $-2.5\sim 0.8\text{ }^{\circ}\text{C}$  in daily maximum series. For the minimum ones, there are about  
339 85% of adjustments are covering  $-0.8\sim 0.5\text{ }^{\circ}\text{C}$ . Table 3 provides the average amplitudes of QM  
340 adjustment at the monthly timescales. It shows that for the maximum data, the larger positive  
341 adjustments are mainly applied to series in January and December, while the larger negative adjustments  
342 are mainly in June, July and August. For the minimum data, all the average amplitudes of QM  
343 adjustment at the monthly timescales are negative, what is the same characteristic with the maximum  
344 ones, temperature series in the warm months (e.g. June, July and August) are adjusted with larger  
345 negative amplitudes, but smaller negative amplitudes for the series in the colder months (e.g. January,  
346 February and December).

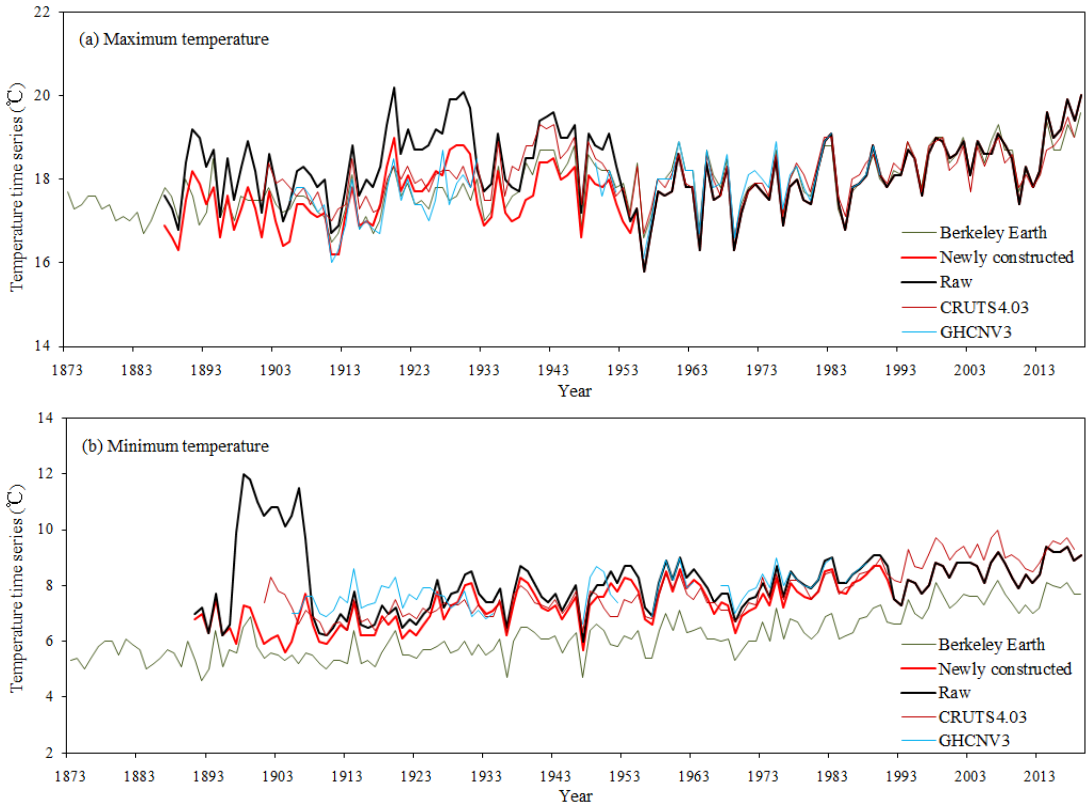

349 **Figure 8.** Annual average series of maximum (a) and minimum (b) temperatures in Tianjin from 1887 (1891 for  
 350 minimum) to 2019 based on newly constructed and raw daily data (after quality control and extension),  
 351 correspondingly with annual averaged data based on the interpolated series from Berkeley Earth-monthly (1873-2019)  
 352 and CRUTS4.03 (1901-2018) and station series from GHCNV3 (1905-1990) for Tianjin station.

353 The average annual maximum and minimum temperature series based on the adjusted daily data  
 354 (the red lines) in Tianjin are given in Fig. 8. The raw time series for Tianjin (after quality control and  
 355 extension), the interpolated series from Berkeley Earth and CRUTS4.03 and station series from  
 356 GHCNV3 for Tianjin station averaged from their monthly data are also displayed in Fig. 8. This shows  
 357 that the newly constructed time series has removed the large shifts in maximum and minimum  
 358 temperature series before 1955 and 1992 (Fig. 8 red lines) compared with the raw ones (Fig. 8 black  
 359 lines). Especially for the minimum data, the QM-adjustments have offset the shifts between 1896 and  
 360 1908 to the greatest extent. Meanwhile, the newly constructed temperature data has similar inter-annual  
 361 variability and trend changes compared to those of Berkeley Earth, CRUTS4.03 and GHCNV3 during  
 362 the overlapping period.

363 **Table 4.** Definition of temperature extremes (Zhang et al., 2011). Days with maximum or minimum temperature above  
 364 the 90th and below the 10th percentiles are relative to the reference period of 1961 - 1990.

| Index | Description | Definition                                           | Units |
|-------|-------------|------------------------------------------------------|-------|
| TN10p | Cold nights | Days when daily minimum temperature <10th percentile | days  |
| TN90p | Warm nights | Days when daily minimum temperature >90th percentile | days  |
| TX10p | Cold days   | Days when daily maximum temperature <10th percentile | days  |
| TX90p | Warm days   | Days when daily maximum temperature >90th percentile | days  |

365

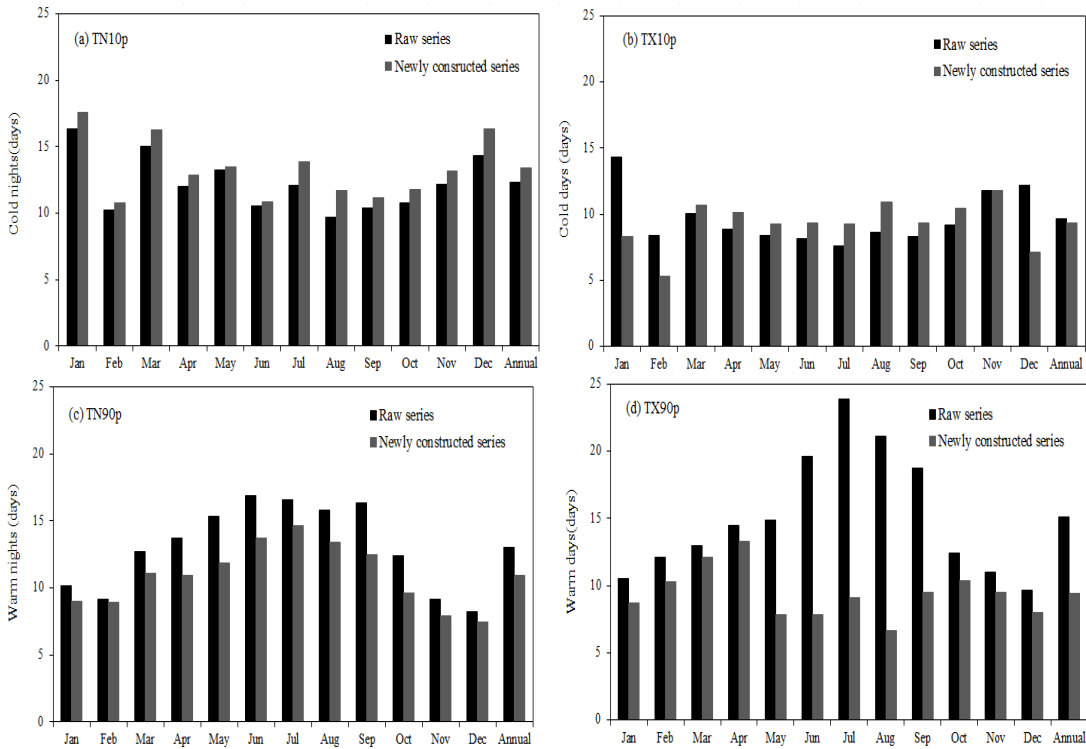

366

367 **Figure 9.** Annual and monthly temperature extremes of Cold nights (TN10p) (a), Cold days (TX10p) (b), Warm nights  
 368 (TN90p) (c) and Warm days (TX90p) (d) for daily newly constructed and raw temperatures (after quality control and  
 369 extension) in Tianjin.

370 Table 4 provides the definition of temperature extremes (Zhang et al., 2011). They are calculated  
 371 based on the newly constructed and raw series (after quality control and extension) in Tianjin. As shown  
 372 in Fig. 9, the number of TN10p (Fig. 9a) and TX10p (Fig. 9b) at the monthly timescales are increased by  
 373 0.3-2.0 days and 0.6-2.3 days based on the newly constructed series, especially in August they are  
 374 increased by 2.0 and 2.3 days respectively. TX10p in cold months (January, February and December)  
 375 from newly data are all less than those from the raw data, with the number of days decreased by 3.1-6.1.  
 376 This is mainly due to large positive adjustments applied to daily maximum temperature in these months  
 377 (Table 3). In the opposite sense, the number of TN90p (Fig. 9c) and TX90p (Fig. 9d) are decreased by  
 378 0.2-3.8 days and 0.9-14.8 days respectively based on the newly constructed series. The decreasing



379 numbers of the two indices between May and September are prominent, especially for TX90p from June  
 380 to August the number is decreased by 11.8-14.8 days. This is due to the large negative adjustments  
 381 applied to daily maximum temperature in these months (Table 3). The number of TN10p (Fig. 9a) from  
 382 newly constructed series at the annual timescales are increased by 1.1 days compared to the raw ones  
 383 while for TX10p (Fig. 9b), TN90p (Fig. 9c) and TX90p (Fig. 9d) are decreased by 0.3, 2.1 and 5.7 days  
 384 respectively.

385 **5 The temperature change trend in Tianjin based on newly constructed series**

386 **5.1 Mean temperature trend during the last 130 years**

387 **Table 5.** Comparisons between newly constructed surface air temperatures and previous assessments of the annual  
 388 trend change at the century-long scale in Tianjin with uncertainties at 95% significance level (Units: °C decade<sup>-1</sup>).

|                     | Newly constructed<br>1887(1891)-2019 | Berkeley Earth<br>(1873-2019) | CRUTS4.03<br>(1901-2018) |
|---------------------|--------------------------------------|-------------------------------|--------------------------|
| Maximum temperature | 0.119±0.015                          | 0.099±0.010                   | 0.062±0.015              |
| Minimum temperature | 0.194±0.013                          | 0.156±0.010                   | 0.217±0.015              |
| Mean temperature    | 0.154±0.013                          | 0.128±0.009                   | 0.140±0.013              |

389 Table 5 ~~indicates~~ shows that the annual trends of newly constructed maximum (1887-2019) and  
 390 minimum temperature (1891-2019) series in Tianjin are 0.119±0.015 °C decade<sup>-1</sup> and 0.194 ±0.013 °C  
 391 decade<sup>-1</sup>. Trend changes based on the newly constructed series are nearly consistent with those in  
 392 Berkeley Earth and CRUTS4.03 on the century-long scale and these are 0.099±0.010 °C decade<sup>-1</sup> and  
 393 0.156±0.010 °C decade<sup>-1</sup>, 0.062±0.015 °C decade<sup>-1</sup> and 0.217±0.015 °C decade<sup>-1</sup> respectively. The trend of  
 394 the mean temperature for the newly constructed series (0.154±0.013 °C decade<sup>-1</sup>) is slightly larger than  
 395 those from the interpolated series from Berkeley Earth, CRUTS4.03, and Cao et al. (2013)  
 396 (0.128±0.009 °C decade<sup>-1</sup>, 0.140±0.013 °C decade<sup>-1</sup>, and 0.098±0.017 °C decade<sup>-1</sup>, respectively). ~~The~~

average temperature trend changes from the newly constructed series are much closer to internationally authoritative data calculations, so they are more consistent. Moreover, annual trend change in mean temperature based on the newly constructed series in at Tianjin is similar also a little larger than that for over the whole China (Li et al., 2020c), which are  $0.130 \pm 0.009$  °C decade<sup>-1</sup>,  $0.114 \pm 0.009$  °C decade<sup>-1</sup> and  $0.121 \pm 0.009$  °C decade<sup>-1</sup> respectively from CRUTEM4, GHCNV3 and C-LSAT (during 1900 - 2017). It conforms to the underlying changes across China. Increasing trends in northern China are more prominent than those from other regions in mainland China (Li et al., 2004; Zhai et al., 2004).

## 5.2 Extreme events change trend during the last 130 years

**Table 6.** Trends in annual and seasonal temperature extremes of Cold nights (TN10p), Cold days (TX10p), Warm nights (TN90p) and Warm days (TX90p) for daily newly constructed temperatures in Tianjin (Units: d decade<sup>-1</sup>).

|        | TN10p   | TX10p   | TN90p  | TX90p  |
|--------|---------|---------|--------|--------|
| Annual | -1.454* | -0.140* | 1.196* | 0.975* |
| Spring | -1.861* | -0.508* | 1.423* | 0.959* |
| Summer | -1.483* | -0.213* | 1.443* | 1.474* |
| Autumn | -0.798* | -0.221* | 0.724* | 0.621* |
| Winter | -1.555* | 0.421*  | 1.119* | 0.850* |

The asterisks indicate trend changes are significant at the 5% level. The annual time periods of TN10p and TN90p cover the 1891-2019 period, TX10p and TX90p cover 1887-2019. The time periods of TN10p and TN90p in spring and summer cover 1891-2019, those in autumn and winter 1890-2019 (winter ending in 2018), and TX10p and TX90p in four seasons all cover 1887-2019 (winter ending in 2018).

Table 6 indicates illustrates that trends of temperature extremes based on the newly constructed series are all significant at the 5% level and have much more coincident changes. The cold extremes (TN10p and TX10p) at annual and seasonal timescales express significantly decreasing trends (except for TX10p in winter), while the warm extremes (TN90p and TX90p) show increasing trends. Trends of TN10p, TX10p, TN90p and TX90p at the annual timescales are  $-1.454$  d decade<sup>-1</sup>,  $-0.140$  d decade<sup>-1</sup>,  $1.196$  d

decade<sup>-1</sup> and 0.975 d decade<sup>-1</sup>, all passed the significance test at the 5% level. For the seasonal change, the negative trends of TN10p and TX10p in spring are the largest, reaching up to trends of TN10p and TX10p in spring are the largest. They are -1.861 d decade<sup>-1</sup> and -0.508 d decade<sup>-1</sup> during the past 130 years. For TN90p and TX90p is in summer, with the amplitude of 1.443 d decade<sup>-1</sup> and 1.474 d decade<sup>-1</sup>.

## 6 Data availability

The newly homogenized daily surface air temperature for Tianjin city over century-long scales are published at PANGAEA (<https://doi.pangaea.de/10.1594/PANGAEA.924561>, last access: 10 November 2020) under the DOI <https://doi.pangaea.de/10.1594/PANGAEA.924561> (Si and Li, 2020). The dataset contain the maximum, minimum and mean temperature time series before and after adjustment as well as new estimates of average and extreme temperature trend change in Tianjin for the period of 1887-2019.

## 7 Conclusions and discussion

This paper documents the various procedures necessary to construct a homogenized daily maximum and minimum temperature series since 1887 for Tianjin. These same-similar procedures could and should be used for other sufficiently long and complete series across the world. The newly constructed data have reduced non-climatic errors at the daily timescale, improved the accuracy and enhanced the real climate representation of average and extreme temperature over century-long scales.

Three sources of surface observation daily data collected by the Tianjin Meteorological Archive have been integrated viz., Department of Industry Agency of British Concession in Tianjin covering Sep 1 1890-Dec 31 1931, Water Conservancy Commission of North China covering Jan 1 1932-Dec 31 1950, and monthly journal sheets of Tianjin surface meteorological observation records covering Jan 1 1951-Dec 31 2019. These three have provided a good foundation for the construction of reliable

438 homogenized daily series by quality control of climatic range checks, climatic outlier checks and  
439 internal consistency checks. Data extension has been undertaken in the interest of extending the length  
440 of the series as far back as possible, but it is carried out only for the daily maximum series due to length  
441 limitation of reference daily data.

442 Using the integration, quality control and extension, we detected and adjusted the statistically  
443 significant breakpoints in the daily maximum and minimum temperature time series from an objective  
444 perspective based on multiple reference series and statistical characteristics from homogenization  
445 detection by means of PMT as well as sophisticated manual data processing. This temperature series  
446 provides a set of new baseline data for the field of extreme climate change over the century-long scale  
447 and a reference for construction of other long-term reliable daily time series in the region. The annual  
448 trends of newly constructed maximum and minimum temperature in Tianjin are  $0.119 \pm 0.015^{\circ}\text{Cdecade}^{-1}$   
449 and  $0.194 \pm 0.013^{\circ}\text{Cdecade}^{-1}$  over the last 130 years, which are similar to those from Berkeley and  
450 CRUTS4.03. The trend of mean temperature averaged from the new series is  $0.154 \pm 0.013^{\circ}\text{Cdecade}^{-1}$ ,  
451 which is of the same order as those over the whole China (Li et al., 2020a; 2020c). The new daily data  
452 also show improvements over the archived datasets for trend analyses of extremes. The trends in TN10p,  
453 TX10p, TN90p and TX90p are all significant at the 5% level, and they give a much more consistent set  
454 of trends. To some extent, changes in climate extremes can be analyzed with higher confidence using the  
455 newly constructed daily data in this paper.

456 However, in the current study, there may be some systematic biases (possibly some potential  
457 breakpoints missed) still in the adjusted time series, since metadata of Tianjin station are not consistently  
458 available in the climatological archives over the whole century as well as not being documented during  
459 the period before 1921. Climate data homogenization does not always follow a consistent pattern (Si et

460 al., 2018; 2019). It is necessary to constantly improve the existing methodology and explore new  
461 techniques in order to obtain reliable homogenized data products. Accordingly, future work should  
462 involve more detailed station metadata and more advanced data processing techniques to produce much  
463 better daily datasets over century scales.

464 **Author contributions.** QL designed and implemented the dataset construction. PS collected the basic  
465 and reference data sources, constructed the dataset and written the paper. QL, PS and PJ all contributed  
466 to data analysis, discussion and writing of the paper.

467 **Competing interests.** The authors declare that they have no conflict of interest.

468 **Acknowledgements.** We thank the many people and /or institutions who contributed to the construction  
469 of this dataset.

470 **Financial support.** This research has been supported by National Natural Fund projects No. 41905132  
471 and No. 41975105.

## 472 **References**

473 [Bai, K. X., Li, K., Wu, C. B., Chang, N. B., and Guo, J. P.: A homogenized daily in situ PM2.5](#)  
474 [concentration dataset from the national air quality monitoring network in China, \*Earth Syst. Sci. Data\*,](#)  
475 [12\(4\): 3067-3080, <https://doi.org/10.5194/essd-12-3067-2020>, 2020.](#)

476 Cao, L. J., Yan, Z. W., Zhao, P., Zhu, Y. N., Yu, Y., Tang, G. L., and Jones P.: Climatic warming in China  
477 during 1901-2015 based on an extended dataset of instrumental temperature records, *Environ. Res.*  
478 *Lett.*, 12(6): 064005, <https://doi.org/10.1088/1748-9326/aa68e8>, 2017.

479 Della-Marta, P. M., and Wanner, H.: A method of homogenizing the extremes and mean of daily  
480 temperature measurements, *J. Climate*, 19(17): 4179-4197, <https://doi.org/10.1175/JCLI3855.1>, 2006.

481 Dienst, M., Lindén, J., Engström, E., and Esper, J.: Removing the relocation bias from the 155-year  
482 Haparanda temperature record in Northern Europe, *Int. J. Climatol.*, 37(11): 4015-4026, [https://](https://doi.org/10.1002/joc.4981)  
483 [doi.org/10.1002/joc.4981](https://doi.org/10.1002/joc.4981), 2017.

484 Hansen, J., Ruedy, R., and Sato Makiko K. Lo.: Global surface temperature change, *Rev. Geophys.*, 48,  
485 RG4004, <https://doi.org/10.1029/2010RG000345>, 2010.

486 Haimberger, L., Tavolato, C., Sperka, S.: Homogenization of the global radiosonde temperature dataset  
487 through combined comparison with reanalysis background series and neighboring stations, *J. Climate*,  
488 25(23): 8108-8131, [https:// doi.org/10.1175/JCLI-D-11-00668.1](https://doi.org/10.1175/JCLI-D-11-00668.1), 2012.

489 Hewarachi, A. P., Li, Y. G., Lund, R., and Rennie, J.: Homogenization of Daily Temperature Data, *J.*  
490 *Climate*, 30, 985-999, [https:// doi.org/10.1175/JCLI-D-16-0139.1](https://doi.org/10.1175/JCLI-D-16-0139.1), 2017.

491 Huang, J. Y., Liu, X. N., Li, Q. X.: The experimental study of reconstruction for summer precipitation  
492 and temperature in China, *Journal of Applied Meteorological Science*, 15(2): 200-206, 2004(in  
493 Chinese).

494 IPCC: Climate Change 2013: The Physical Science Basis. Contribution of Working Group I to the Fifth  
495 Assessment Report of the Intergovernmental Panel on Climate Change, Stocker TF, Qin D, Plattner G  
496 K, TignorM, Allen SK, Boschung J, Nauels A, Xia Y, Bex V, Midgley PM. (eds.): 1535 pp. Cambridge  
497 University Press: Cambridge, UK 25 and New York, NY, 2013.

498 Jones, P. D., Lister, D., Osborn, T. J., Harpham, C., Salmon, M., and Morice C.: Hemispheric and  
499 large-scale land-surface air temperature variations: an extensive revision and an update to 2010, *J.*  
500 *Geophys. Res.*, 117, D05127, [https:// doi.org/10.1029/2011JD017139](https://doi.org/10.1029/2011JD017139), 2012.

501 Lawrimore, J. H., Menne, M. J., Gleason, B., Williams, C. N., Wuertz, D. B., Vose, R. S., and Rennie, J.:  
502 An overview of the Global Historical Climatology Network monthly mean temperature data set,

503 Version 3, *J. Geophys. Res.*, 116, D19, <https://doi.org/10.1029/2011JD016187>, 2011.

504 Leeper, R. D., Rennie, J., Palecki, M. A.: Observation perspectives from U.S. Climate Reference  
505 Network (USCRN) and Cooperative Observer Program (COOP) Network: temperature and  
506 precipitation comparison, *J. Atmos. Oceanic Technol.*, 32(4): 703-721,  
507 <https://doi.org/10.1175/JTECH-D-14-00172.1>, 2015.

508 Lenssen, N. J. L., Schmidt, G. A., Hansen, J., Menne, M. J., Persin, A., Ruedy, R., and Zyss, D.:  
509 Improvements in the GISTEMP uncertainty model, *J. Geophys. Res.*, 124(12): 6307-6326,  
510 <https://doi.org/10.1029/2018JD029522>, 2019.

511 Li, Q. X., Sun, W. B., Huang, B. Y., Dong, W. J., Wang, X. L., Zhai, P. M., and Jones, P.: Consistency of  
512 global warming trends strengthened since 1880s, *Science Bulletin*,  
513 <https://doi.org/10.1016/j.scib.2020.06.009>, 2020a.

514 Li, Q. X., Sun, W. B., Huang, B. Y., Dong, W. J., Wang, X. L., Zhai, P. M., and Jones, P.: An updated  
515 evaluation on the global Mean Surface Temperature trends since the start of 20th century, *Climate*  
516 *Dynamics*, in review. 2020b.

517 Li, Q. X., Dong, W. J., and Jones, P.: Continental Scale Surface Air Temperature Variations: Experience  
518 Derived from the Chinese Region, *Earth-Science Reviews*, 200, 102998,  
519 <https://doi.org/10.1016/j.earscirev.2019.102998>, 2020c.

520 Li, Q. X., Zhang, L., Xu, W. H., Zhou, T. J., Wang, J. F., Zhai, P. M., and Jones, P.: Comparisons of time  
521 series of annual mean surface air temperature for China since the 1900s: Observation, Model  
522 simulation and extended reanalysis, *Bull. Amer. Meteor. Soc.*, 98(4):699-711, <https://doi.org/10.1175/BAMS-D-16-0092.1>, 2017.

524 Li, Q. X., Dong, W. J., Li, W., Gao, X. R., Jones P., Parker D., and Kennedy J.: Assessment of the

525 uncertainties in temperature change in China during the last century, *Chin. Sci. Bull.* 55(19):  
526 1974-1982, <https://doi.org/10.1007/s11434-010-3209-1>, 2010.

527 [Li, Q. X., Zhang, H. Z., Liu, X. N., and Huang, J. Y.: Urban heat island effect on annual mean](#)  
528 [temperature during the last 50 years in China, \*Theor. Appl. Climatol.\*, 79, 165-174,](#)  
529 <https://doi.org/10.1007/s00704-004-0065-4>, 2004.

530 Li, Y., Tinz, B., Storch, H., Wang, Q. Y., Zhou, Q. L., and Zhu, Y. N.: Construction of a surface air  
531 temperature series for Qingdao in China for the period 1899 to 2014, *Earth Syst. Sci. Data*, 10(1):  
532 643-652, <https://doi.org/10.5194/essd-10-643-2018>, 2018.

533 [Lv, Y. M., Guo, J. P., Yim, S. H., Yun, Y. X., Yin, J. F., Liu, L., Zhang, Y., Yang, Y. J., Yan, Y., and Chen,](#)  
534 [D. D.: Towards understanding multi-model precipitation predictions from CMIP5 based on China](#)  
535 [hourly merged precipitation analysis data, \*Atmos. Res.\*, 231\(1\): 104671,](#)  
536 <https://doi.org/10.1016/j.atmosres.2019.104671>, 2020.

537 Menne, M. J., Durre, I., Vose, R. S., Gleason, B., and Houston, T. G.: An overview of the global  
538 historical climatology network-daily database, *J. Atmos. Ocean. Technol.*, 29(7): 897-910,  
539 <https://doi.org/10.1175/JTECH-D-11-00103.1>, 2012.

540 Menne, M. J., Williams, C. N., Gleason B. E., Rennie J. J., and Lawrimore, J. H.: The global historical  
541 climatology network monthly temperature dataset, Version4, *J. Climate*, 31(24): 9835-9854,  
542 <https://doi.org/10.1175/JCLI-D-18-0094.1>, 2018.

543 Png, I. P. L., Chen, Y., Chu, J. H., Feng Y. K., Lin, E. K. H., and Tseng W. L.: Temperature, precipitation  
544 and sunshine across China, 1912-51: A new daily instrumental dataset, *Geosci. Data J.*, 1-13,  
545 <https://doi.org/10.1002/gdj3.91>, 2020.

546 Quayle, R. G., Easterling, D. R., Karl T. R., Hughes, P. Y.: Effects of recent thermometer changes in the

带格式的: 缩进: 左侧: 0 厘米,  
首行缩进: 0 字符

带格式的: 缩进: 左侧: 0 厘米,  
首行缩进: 0 字符



547 cooperative station network, *Bull. Amer. Meteor. Soc.*, 72(11):1718-1723,  
548 [https://doi.org/10.1175/1520-0477\(1991\)0722.0.CO;2](https://doi.org/10.1175/1520-0477(1991)0722.0.CO;2), 1991.

549 Rahimzadeh, F., and Zavareh, M. N.: Effects of adjustment for non-climatic discontinuities on  
550 determination of temperature trends and variability over Iran, *Int. J. Climatol.*, 34(6): 2079-2096,  
551 <https://doi.org/10.1002/joc.3823>, 2014.

552 Rohde, R., Muller, R. A., Jacobsen, R., Muller, E., Perlmutter, S., Rosenfeld, A., Wurtele J., Groom, D.,  
553 and Wickham, C.: A new estimate of the average earth surface land temperature spanning 1753 to  
554 2011, *Geoinfor. Geostat: An overview*, 1, <https://doi.org/10.4172/2327-4581.1000101>, 2013.

555 Si, P., Zheng, Z. F., Ren, Y., Liang, D. P., Li, M. C., and Shu, W. J.: Effects of urbanization on daily  
556 temperature extremes in North China, *J. Geogr. Sci.*, 24(2): 349-362, [https://doi.org/](https://doi.org/10.1007/s11442-014-1092-4)  
557 [10.1007/s11442-014-1092-4](https://doi.org/10.1007/s11442-014-1092-4), 2014.

558 Si, P., Hao, L. S., Luo, C. J., Cao, X. C., and Liang, D. P.: The interpolation and homogenization of  
559 long-term temperature time series at Baoding observation station in Hebei Province, *Climate Change*  
560 *Research*, 13(1): 41-51, 2017 (in Chinese).

561 Si, P., Luo, C. J., and Liang, D. P.: Homogenization of Tianjin monthly near-surface wind speed using  
562 RHtestsV4 for 1951-2014, *Theor. Appl. Climatol.*, 132 (3-4): 1303-1320, [https://doi.org/](https://doi.org/10.1007/s00704-017-2140-7)  
563 [10.1007/s00704-017-2140-7](https://doi.org/10.1007/s00704-017-2140-7), 2018.

564 Si, P., Luo, C. J., and Wang, M.: Homogenization of Surface Pressure Data in Tianjin, China, *J. Meteor.*  
565 *Res.*, 33(6): 1131-1142, <https://doi.org/10.1007/s13351-019-9043-8>, 2019.

566 Si, P., Wang, J., Li, H. J., and Nian, F. X.: Homogenization and application of meteorological  
567 observation data at provincial level. Beijing: China Meteorological Press, 76-91, 2020(in Chinese).

568 Si, P., and Li, Q. X.: Tianjin homogenized daily surface air temperature over century-long scale.

569 PANGAEA, <https://doi.pangaea.de/10.1594/PANGAEA.924561>, 2020.

570 Sun, X. B., Ren, G. Y., Xu, W. H., Li, Q. X., and Ren, Y. Y.: Global land-surface air temperature change  
571 based on the new CMA GLSAT data set, *Science Bulletin*, 62(4): 236-238,  
572 <http://doi.org/10.1016/j.scib.2017.01.017>, 2017.

573 Trewin, B.: A daily homogenized temperature data set for Australia, *Int. J. Climatol.*, 33(6): 1510-1529,  
574 <http://doi.org/10.1002/joc.3530>, 2013.

575 Harris, I. C., Jones, P. D. CRU TS4.03: Climatic Research Unit (CRU) Time-Series (TS) version 4.03 of  
576 high-resolution gridded data of month-by-month variation in climate (Jan. 1901- Dec. 2018). Centre  
577 for Environmental Data Analysis, 22, <http://doi.org/10.5285/10d3e3640f004c578403419aac167d82>,  
578 2020.

579 Vincent, L. A., Wang, X. L., Milewska, E. J., Wan, H. Yang, F., and Swail, V. R.: A second generation of  
580 homogenized Canadian monthly surface air temperature for climate trend analysis, *J. Geophys. Res.*,  
581 117, D18110, <http://doi.org/10.1029/2012JD017859>, 2012.

582 Vincent, L. A., Zhang, X., Bonsal, B. R., and Hogg, W. D.: Homogenization of daily temperature over  
583 Canada, *J. Climate*, 15:1322-1334, [http://doi.org/10.1175/1520-0442\(2002\)0152.0.CO;2](http://doi.org/10.1175/1520-0442(2002)0152.0.CO;2), 2002.

584 Wang, S. W., Ye, J. L., Gong, D. Y., Zhu, J. H., and Yao, T. D.: Construction of mean annual temperature  
585 series for the LSAT one hundred years in China, *Quarterly Journal of Applied Meteorology*, 9(4):  
586 392-401, 1998(in Chinese).

587 Wang, S. W., Gong, D. Y., Ye, J. L., and Chen, Z. H.: Seasonal precipitation series of Eastern China  
588 since 1880 and the variability, *Acta Geographica Sinica*, 35(3): 281-293, 2000 (in Chinese).

589 Wang, X. L., Wen, Q. H., and Wu Y. H.: Penalized maximal t test for detecting undocumented mean  
590 change in climate data series, *J. Appl. Meteor. Climatol.*, 46, 916-931, <http://>

591 [doi.org/10.1175/JAM2504.1](https://doi.org/10.1175/JAM2504.1), 2007.

592 Wang, X. L., Chen, H. F., Wu, Y. H., Feng, Y., and Pu, Q.: New techniques for the detection and  
593 adjustment of shifts in daily precipitation data series, *J. Appl. Meteor. Climatol.*, 49, 2416-2436,  
594 [http:// doi.org/10.1175/2010jamc2376.1](http://doi.org/10.1175/2010jamc2376.1), 2010.

595 Wu, Z. X.: *China Modern Meteorological Station*. Beijing: China Meteorological Press, 180-182, 2007  
596 (in Chinese).

597 Xu, C. D., Wang, J. F., and Li, Q. X.: A new method for temperature spatial interpolation based on sparse  
598 historical stations, *J. Climate*, 31(5): 1757-1770, [http:// doi.org/10.1175/JCLI-D-17-0150.1](http://doi.org/10.1175/JCLI-D-17-0150.1), 2018.

599 Xu, W. H., Li, Q. X., Jones, P., Wang, X. L., Trewin, B., Yang, S., Zhu, C., Zhai, P. M., Wang, J. F.,  
600 Vincent, L. A., Dai, A. G., Gao, Y., and Ding, Y. H.: A new integrated and homogenized global  
601 monthly land surface air temperature dataset for the period since 1900, *Clim. Dynam.*, 50(15):  
602 2513-2536, [http:// doi.org/10.1007/s00382-017-3755-1](http://doi.org/10.1007/s00382-017-3755-1), 2018.

603 Xu, W. Q., Li, Q. X., Wang, X. L., Yang, S., Cao, L. J., and Feng, Y.: Homogenization of Chinese daily  
604 surface air temperatures and analysis of trends in the extreme temperature indices, *J. Geophys. Res.*  
605 *Atmos.*, 118, [http:// doi.org/10.1002/jgrd.50791](http://doi.org/10.1002/jgrd.50791), 2013.

606 Yan, Z. W., Chi, Y., and Jones, P.: Influence of inhomogeneity on the estimation of mean and extreme  
607 temperature trends in Beijing and Shanghai, *Adv. Atmos. Sci.*, 18(3): 309-322, [http://](http://doi.org/10.1007/BF02919312)  
608 [doi.org/10.1007/BF02919312](http://doi.org/10.1007/BF02919312), 2001.

609 Yu, J., Li, Q. X., Zhang, T. W., Xu, W. H., Zhang, L., and Cui, Y.: The merging test using measurements,  
610 paleoclimate reconstruction and climate model data based on Bayesian model, *Acta Meteorologica*  
611 *Sinica*, 76(2): 304-314, 2018(in Chinese).

612 Zhang, X., Alexander, L., Hegerl, G.C., Jones, P.D., Klein Tank, A., Peterson, T.C., Trewin, B. and

613 Zwiers, F.W.: Indices for monitoring changes in extremes based on daily temperature and precipitation  
614 data. WIREs Climate Change, 2, 851-870, [http:// doi.org/10.1002/wcc/147](http://doi.org/10.1002/wcc/147), 2011.

615 Zheng, J. Y., Liu, Y., Ge Q. S., Hao, Z. X.: Spring phenodate records derived from historical documents  
616 and reconstruction on temperature change in Central China during 1850-2008, Acta Geographica  
617 Sinica, 70(5): 696-704, 2015(in Chinese).

618 [Zhai., P. M., Chao., Q. C., and Zou., X. K.: Progress in China's climate change study in the 20th century,](#)  
619 [J. Geograph. Sci., 14\(1\): 3-11, <https://doi.org/10.1007/BF02841101>, 2004.](#)
