# Supplementary material for: Construction of homogenized daily surface air temperature for Tianjin city during 1887–2019
Source: Copernicus journal article supplement (doi:10.5194/essd-2020-343), 2021-01-22
Supplement: Supplementary file [file essd-2020-343-AC3-supplement.pdf]

# 1 Construction of homogenized daily surface air 2 temperature for Tianjin city during 1887-2019

3 Peng Si<sup>1</sup>, Qingxiang Li<sup>2, 4</sup>, and Phil Jones<sup>3</sup>

4 <sup>1</sup> Tianjin Meteorological Information Center, Tianjin Meteorological Bureau, Tianjin, China

5 <sup>2</sup> School of Atmospheric Sciences, Sun Yat-sen University, Guangzhou, China

6 <sup>3</sup> Climatic Research Unit, School of Environmental Sciences, University of East Anglia, Norwich, UK

7 <sup>4</sup> Key Laboratory of Tropical Atmosphere-Ocean System (Sun Yat-sen University), Ministry of Education, and  
8 Southern Laboratory of Ocean Science and Engineering (Guangdong Zhuhai), Zhuhai, China

9  
10  
11  
12  
13 ResSubmitted to *Earth System Science Data*

14 March 2021

15 Nov 2020

16  
17  
18  
19  
20  
21 **\*Corresponding author:**

22 Prof. Qingxiang Li

23 School of Atmospheric Sciences

24 Sun Yat-Sen University

25 Tangjiawan, Zhuhai Campus of SYSU

26 Zhuhai, China, 519082

27 Tel/Fax: 86-756-3668352

28 E-Mail: liqingx5@mail.sysu.edu.cn

32 **Abstract.** The century-long continuous daily observations from some stations are important for the  
33 study of long-term trends and extreme climate events in the past. In this paper, three daily data sources:  
34 (1) Department of Industry Agency of British Concession in Tianjin covering Sep 1 1890-Dec 31 1931  
35 (2) Water Conservancy Commission of North China covering Jan 1 1932-Dec 31 1950 and (3) monthly  
36 journal sheets for Tianjin surface meteorological observation records covering Jan 1 1951-Dec 31 2019  
37 have been collected from the Tianjin Meteorological Archive. The completed daily maximum and  
38 minimum temperature series for Tianjin from Jan 1 1887 (Sep 1 1890 for minimum) to Dec 31 2019 has  
39 been constructed and assessed for quality control and an early extension from 1890 to 1887. Several  
40 significant breakpoints are detected by the Penalized Maximal T-test (PMT) for the daily maximum and  
41 minimum time series using multiple reference series around Tianjin from monthly Berkeley Earth (BE),  
42 CRUTS4.03 and GHCNV3 data. Using neighboring daily series the record has been homogenized with  
43 Quantile Matching (QM) adjustments. Based on the homogenized dataset, the warming trend in annual  
44 mean temperature in Tianjin averaged from the newly constructed daily maximum and minimum  
45 temperature is evaluated as  $0.154 \pm 0.013 \text{ } ^\circ\text{C decade}^{-1}$  during the last 130 years. Trends of temperature  
46 extremes in Tianjin are all significant at the 5% level, and have much more coincident change than those  
47 from the raw, with amplitudes of  $-1.454 \text{ d decade}^{-1}$ ,  $1.196 \text{ d decade}^{-1}$ ,  $-0.140 \text{ d decade}^{-1}$  and  $0.975 \text{ d}$   
48  $\text{decade}^{-1}$  for cold nights (TN10p), warm nights (TN90p), cold days (TX10p) and warm days (TX90p) at  
49 the annual scale. The adjusted daily maximum, minimum and mean surface air temperature dataset for  
50 Tianjin city presented here is publicly available at <https://doi.pangaea.de/10.1594/PANGAEA.924561>  
51 (Si and Li, 2020).

52

## 53 1 Introduction

54 Instrumental observation records at meteorological stations are the most widely used first-hand  
55 information about weather and climate change and variability. They have the advantages of [better](#)  
56 representativeness as well as accuracy compared to other data (Leeper et al., 2015; Dienst et al., 2017;  
57 Xu et al., 2018). The most representative long-term observational temperature datasets in the world since  
58 IPCC AR5 (2013) includes: Global Historical Climatology Network(GHCN)-monthly(GHCNm) dataset  
59 (Lawrimore et al., 2011; Menne et al., 2018), Climatic Research Unit (CRU) datasets (Jones et al., 2012;  
60 Harris et al., 2020), Goddard Institute for Space Studies (GISTEMP) dataset (Hansen et al., 2010;  
61 Lenssen et al., 2019) and Berkeley Earth [Surface-surface Temperature-temperature \(BEST\)](#) (Rohde et al,  
62 2013). Recently, in order to make up for the limited coverage and the potential regional variability of  
63 data quality of current global climate datasets, Xu et al. (2018) has developed a new dataset of integrated  
64 and homogenized global land surface air temperature-monthly (C-LSAT). This has been updated to  
65 C-LSAT2.0, with the data extended to the period 1850-2019 (Li et al., 2020a; ~~2020b~~2021). These  
66 datasets were all developed at the monthly scale based upon meteorological station records from  
67 different continents over the world through the integration of different data sources, quality control of  
68 climate outliers, time and space consistency, and the analysis of data homogenization. The Global  
69 Historical Climatology Network-daily (GHCNd) dataset has also been developed, to meet the needs of  
70 climate analysis and monitoring research, but about two-thirds of the stations contributing to this dataset  
71 report precipitation only. In addition, GHCNd dataset has not been homogenized for artifacts due to  
72 changes in reporting practice at different times at particular stations (i.e., systematic biases), although the  
73 entire dataset has been quality controlled (Menne et al., 2012).

74 Chinese scholars, since the 1980s, have also carried out many studies on the establishment of  
75 long-term observational time series in China, but they often mainly used tree rings, ice cores, historical  
76 materials and other proxy data as part of the restoration of time series before the 1950 (~~the founding of~~  
77 ~~the People's Republic of China~~)(Wang et al., 1998; 2000; Zheng et al., 2015; Yu et al., 2018). The

78 results based on these data are of great significance as they reveal the characteristics of climate  
79 periodicity and multi-scale changes over the past hundred years, but they are insufficient to meet the  
80 needs of quantitative monitoring and detection of long-term extreme climate events. In particular, there  
81 are many limitations when homogenizing the time series before the 1950s (including the establishment  
82 of reference series) such as the lack of continuous observational data, detailed and reliable metadata  
83 information, leading to the increase of uncertainties for regional and/or local climate analysis (Li et al.,  
84 [2020a](#), [2020b](#)). As a result there still exists many uncertainties in the characteristics of climate change  
85 from the 19<sup>th</sup> century to the mid-20th century (Li et al., 2010; 2017; Sun et al., 2017; Cao et al., 2017).

86 Since daily time series generally contain many more observations than monthly or annual series,  
87 daily analyses potentially have greater precision. As a result they are more useful in climate trend and  
88 variability studies, especially for extreme events (Vincent et al., 2012; Xu et al., 2013; Trewin, 2013;  
89 Hewaarachchi et al., 2017). However, due to difficulties in collecting and/or receiving daily data all over  
90 the world as well as non-climatic effects such as changes in observation times, there are numerous issues.  
91 For example, observations from temperature sites at principal stations in Canada were changed to be  
92 read at 0000UTC to 0600UTC (Vincent et al., 2002), making it is very difficult to form a global daily  
93 data product at century-long scales. This makes it extremely difficult to study global and/or regional  
94 extreme events over the past hundred years, especially before 1950. For some regional areas, daily  
95 instrumental observations may be extended to the 19<sup>th</sup> century and hence they are more valuable. Png et  
96 al. (2020) has compiled 463,530 instrumental observations of daily temperature, precipitation and  
97 sunshine from 319 stations distributed over China during 1912-1951 mostly from the source of monthly  
98 reports from the Institute of Meteorology, Nanjing; observatories over Japan-occupied Manchuria and  
99 the Japanese Army for North China. Since this is a daily data, it is immensely useful for the analysis of  
100 mesoscale and sub-seasonal climate variations. Although the earliest instrumental observations in China  
101 began in the 1840s, observations at some sites were interrupted during 1940s due to wars (e.g. the War  
102 of Resistance Against Japan and the War of Liberation) and hence many pieces of information have

103 likely been lost. Studies of the rescuing, processing and constructing complete and continuous daily site  
104 data over China are somewhat rare.

105 Due to the historic reasons of leased territory in China, some local single sites often have multiple  
106 observational sources before 1950. For example, for Qingdao, monthly surface air temperature series  
107 during 1899 - 2014 have been constructed based on newly digitized and homogenized observations from  
108 the German National Meteorological Service from 1899 to 1913 (Li et al., 2018). Tianjin meteorological  
109 station is one of the typical stations with more than one hundred years of observed climate data in China  
110 (Yan et al., 2001; Si et al., 2017). This station also has multi-source observations before 1950 as  
111 observed at some other meteorological stations in China having century-long datasets. Thus, considering  
112 Tianjin station as an example, this paper aims to construct a new daily instrumental maximum and  
113 minimum temperature series on the century scale in China, through integration, quality control,  
114 extension and homogenization of the multiple daily observations. The newly constructed daily  
115 temperatures in Tianjin provide relatively longer, more complete and reliable climate series for studies of  
116 climate and extreme climate change over century-long scales.

117 The remainder of this paper is arranged as follows: Section 2 describes the station histories from  
118 Tianjin. The basic data and reference data sources and their pre-processing are introduced in section 3.  
119 Section 4 introduces the procedures of constructing new daily maximum and minimum temperature  
120 series. Section 5 presents average and extreme temperature trend change based on newly constructed  
121 series. The availability of the resulting dataset (Si and Li, 2020) is reported in section 6, and summary of  
122 results and some discussion are given in section 7.

## 123 **2 Historical evolution of Tianjin meteorological observation station**

124 Wu (2007) showed that Tianjin meteorological observation station was under the control of the  
125 Department of Industry Agency of [the](#) British Concession in Tianjin covering September 1887 to  
126 December 1941. During the period from September 1904 to December 1949, it was co-ordinated by

127 many departments, such as Japan Central Meteorological Station, Central Meteorological Bureau of the  
 128 Republic of China, Aviation Department of North China Military Region of the People's Liberation  
 129 Army (PLA), Shunzhi Water Conservancy Commission, Water Conservancy Commission of North  
 130 China and Water Conservancy Engineering Bureau of North China. However, only the records of daily  
 131 maximum and minimum temperatures from Department of Industry Agency of the British Concession in  
 132 Tianjin (Fig.1a-b) and Water Conservancy Commission of North China (Fig.1c) have been collected by  
 133 the Tianjin Meteorological Archive. Each of these is continuous and complete, and most importantly  
 134 they can be connected to each other on 1 Jan 1932 without overlapping, thereby forming a complete and  
 135 continuous time series before 1950.

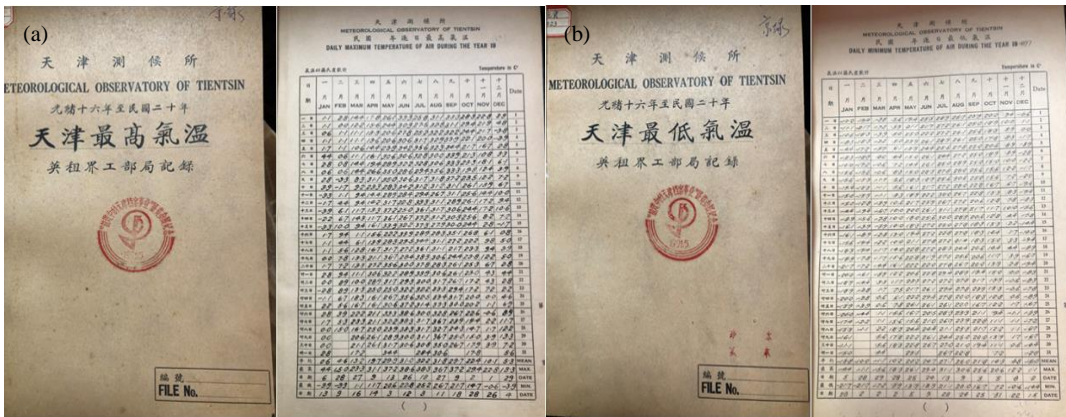

136

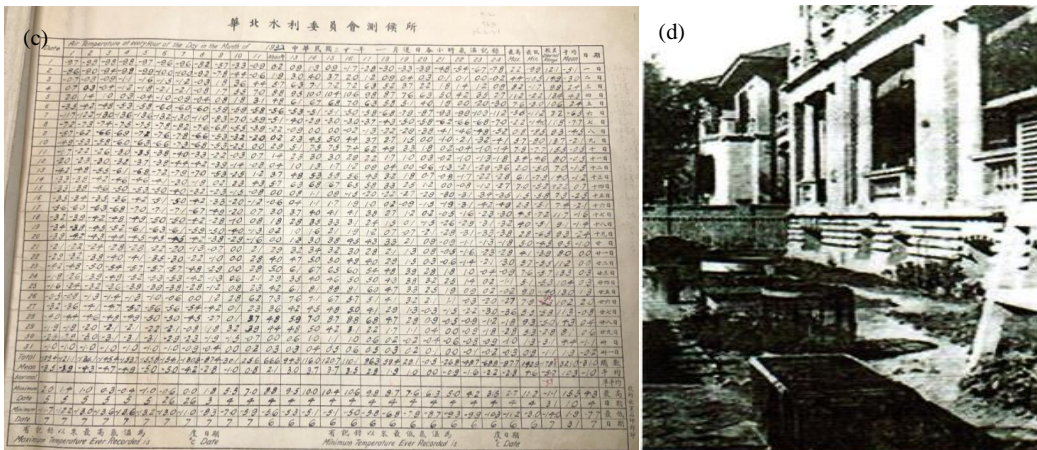

137

138 **Figure 1.** The handwritten observation records of Tianjin before 1950, (a) and (b) for records of maximum and  
139 minimum temperatures from Department of Industry Agency of British Concession in Tianjin, (c) for records from  
140 Water Conservancy Commission of North China, and Tianjin Observatory at No. 22 Ziyou Road (d). These  
141 photographs were provided by Tianjin Meteorological Archive, Tianjin Meteorological Bureau.

142 The daily temperature records at Tianjin meteorological observation station that we have accessed  
143 begin with Sep 1 1890 collected by Tianjin Meteorological Archive (Fig.1a-c). The metadata history of  
144 the Tianjin observation station during Sep 1 1890 - Dec 31 2019 is listed in Table 1. The history is sorted  
145 according to the Surface Meteorological Observation Specifications in China (versions of 1950, 1954,  
146 1964, 1979, and 2003), metadata of China surface meteorological station and journal sheets of Tianjin  
147 surface meteorological records. Changes to observational times have been marked on the original time  
148 series of maximum and minimum temperatures for Tianjin city (see Fig. 2). As shown in Table 1, Tianjin  
149 observation station has relocated four times since 1890, several times in 1921 (Fig. 1d), Jan 1 1955, Jan  
150 1 1992, and Jan 1 2010 without prominent changes in elevations. The environment surroundings of  
151 Tianjin station changed from urban to suburban in 1955, accompanied by a number of instrument  
152 changes. In this period, changes to the instrument manufacturer have happened four times for both  
153 maximum and minimum temperature series, as well as changes of automatic observation instead of  
154 manual observation in 2004 and a new generation replacement of last automatic instrument in 2014. In  
155 documented metadata (Table 1), there have been changes of observing time four times for both  
156 maximum and minimum temperatures since 1951, but they were always recorded over a 24-hour  
157 observational window at Beijing Time (BT) or similar to BT (as for the period of Jan 1 1954 - Dec 31  
158 1960). Moreover, it is important to mention here that since 1951 there were two stations viz., Tianjin and  
159 Xiqing collocated in the Tianjin area. Due to rapid urbanization at the surrounding environmental Tianjin  
160 area, the old Tianjin site gradually becomes less representative as a climate observation station and  
161 therefore since Jan 1 1992 afterwards, observations at Xiqing station are used to replace the old Tianjin

162 station. This can also be considered as Tianjin station being relocated to Xiqing station since then.

163 **Table 1.** The history logs at Tianjin meteorological observation station during Sep 1 1890 - Dec 31 2019.

| Periods                 | Latitude | Longitude | Altitude (m) | Address<br>(Surrounding<br>environment)                             | Relocation<br>description             | Instrument<br>change                                                             | Observing<br>time              |
|-------------------------|----------|-----------|--------------|---------------------------------------------------------------------|---------------------------------------|----------------------------------------------------------------------------------|--------------------------------|
| 1890.9.1—<br>1921       | 39°07'   | 117°12'   | unspecified  | unspecified                                                         | —                                     | unspecified                                                                      | unspecified                    |
| 1921—<br>1950.12.31     | 39°08'   | 117°11'   | 6.0          | No. 22 Ziyou<br>Road, The Third<br>Distribution,<br>Tianjin (urban) | unspecified                           | unspecified                                                                      | unspecified                    |
| 1951.1.1—<br>1953.12.31 | 39°08'   | 117°11'   | 6.0          | Same as above                                                       | —                                     | —                                                                                | Tmax<br>18:00<br>Tmin<br>09:00 |
| 1954.1.1—<br>1954.12.31 | 39°08'   | 117°11'   | 6.0          | Same as above                                                       | —                                     | 1954.1.1<br>Tmin<br>1954.1.1                                                     | unspecified                    |
| 1955.1.1—<br>1960.12.31 | 39°06'   | 117°10'   | 3.3          | Zunyi Road,<br>Hexi<br>Distribution,<br>Tianjin<br>(suburban)       | 5 km north of<br>the original<br>site | —                                                                                | unspecified                    |
| 1961.1.1—<br>1991.12.31 | 39°06'   | 117°10'   | 3.3          | Qixiangtai Road,<br>Hexi<br>Distribution,<br>Tianjin<br>(suburban)  | —                                     | 1961.1.1;<br>1973.1.1;<br>1989.1.1<br>Tmin<br>1961.1.1;<br>1966.1.1;<br>1989.1.1 | 20:00                          |



| Xidawa, Xiqing          |        |         |     |                                                                  |                                              |                                                            |                                        |
|-------------------------|--------|---------|-----|------------------------------------------------------------------|----------------------------------------------|------------------------------------------------------------|----------------------------------------|
| 1992.1.1—<br>2003.12.31 | 39°05' | 117°04' | 2.5 | Distribution,<br>Tianjin<br>(suburban)                           | unspecified                                  | —                                                          | 20:00                                  |
| 2004.1.1—<br>2009.12.31 | 39°05' | 117°04' | 2.5 | Same as above                                                    | —                                            | automatic<br>observation                                   | pick up from<br>timing<br>minutes data |
| 2010.1.1—<br>2013.12.31 | 39°05' | 117°03' | 3.5 | Jingfu Road,<br>Xiqing<br>Distribution,<br>Tianjin<br>(suburban) | 1.5km<br>southwest of<br>the site in<br>1992 | automatic<br>observation                                   | pick up from<br>timing<br>minutes data |
| 2014.1.1 to<br>now      | 39°05' | 117°03' | 3.5 | Same as above                                                    | —                                            | new generation<br>of automatic<br>observation<br>equipment | pick up from<br>timing<br>minutes data |

164 The straight line (—) indicates no change. The observing time is at Beijing Time (BT). Tmax and Tmin indicate the  
 165 maximum and minimum temperature, respectively.

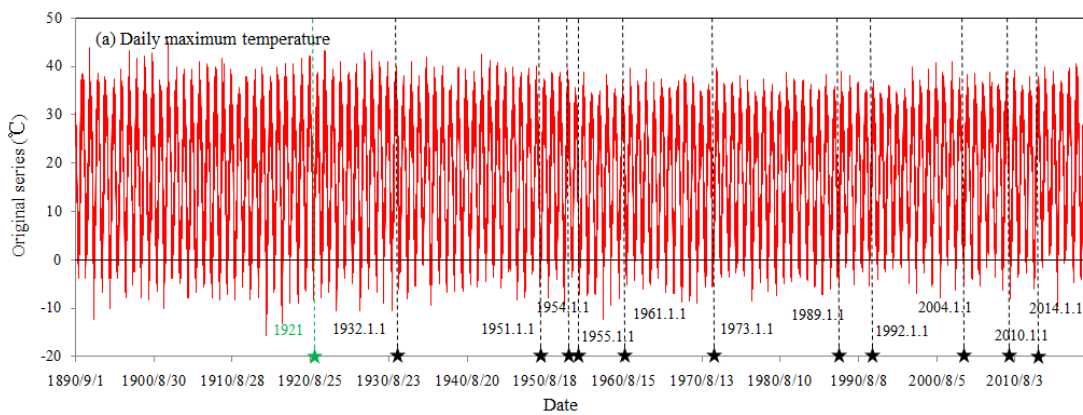

166

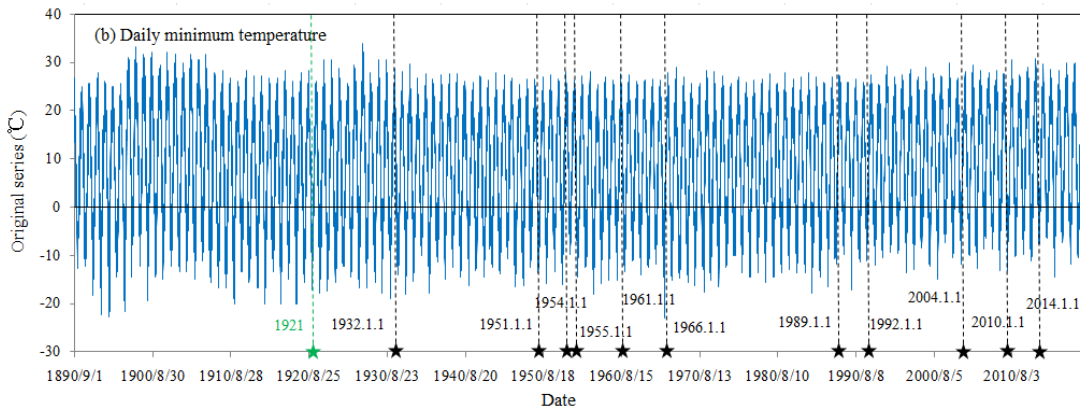

167

168 **Figure 2.** Original series of daily maximum temperature (a) and minimum temperature (b) at Tianjin meteorological  
 169 observation station covering Sep 1 1890 - Dec 31 2019. Black stars with vertical dashed lines on the axes mark  
 170 metadata times (The relocation point in 1921 is marked by green star with vertical dashed line due to no specific date).

### 171 3 Data sources

#### 172 3.1 Original data and preliminary quality control

173 Based on the analyses of metadata history at Tianjin station discussed in section 2, this paper selects  
 174 three observation temperature data sources collected by Tianjin Meteorological Archive as the basic data  
 175 to construct the daily maximum and minimum temperature time series at Tianjin station from 1890 (Fig.  
 176 2). These are the daily observation records from (1) Department of Industry Agency of British  
 177 Concession in Tianjin covering Sep 1 1890 - Dec 31 1931; (2) Water Conservancy Commission of North  
 178 China during Jan 1 1932 - Dec 31 1950; and (3) monthly journal sheets of Tianjin surface  
 179 meteorological observation records covering Jan 1 1951 - Dec 31 2019. Since there are no missing data  
 180 and overlap for each of the three daily sources, the three daily data resources are directly spliced into a  
 181 complete time series. However, in view of the regime changes of operation and different station numbers  
 182 between Tianjin station and Xiqing station that happened at Jan 1 1992 (Table 1), the daily records from  
 183 Jan 1 1951 to Dec 31 1991 observed in the Hexi area and those observed at Xiqing area from Jan 1 1992  
 184 to Dec 31 2019 are used to form the basic daily time series from Jan 1 1951 to Dec 31 2019 for the long

185 series.

186 A preliminary quality control procedure consisting of multiple steps was carried out on the original  
187 integrated daily time series of maximum and minimum temperature from Sep 1 1890 to Dec 31 2019 at  
188 Tianjin to remove any errors caused by manual observations, instrument malfunctions and digital inputs.  
189 Firstly, the range of the daily maximum or minimum temperature was scrutinized for magnitude beyond  
190 the limit of 60 °C and -80 °C as errors. Fortunately, both the series have no such error. Secondly based  
191 on anomalies from the 1961-1990 as reference period, climatic outliers of maximum and minimum  
192 temperature are assessed considering a magnitude exceeding five standard deviations of their monthly  
193 anomalies as outliers during 1890-2019. There is no outlier found in our validation. Finally, internal  
194 consistency is investigated by checking if there is any minimum temperature data greater than or equal  
195 to the maximum at the same date and no such inconsistencies were found. It is important to mention that  
196 there is a sudden rise in annual minimum temperature series during the year 1927 even after these three  
197 checks. The offsets of the discontinuities in 1927 compared with averages for the two sections before  
198 and after it are 4.2 °C and 3.4 °C, respectively. We repeated the steps of outlier checks once by  
199 reviewing the earlier condition with three times the standard deviation of monthly anomalies. Results  
200 indicate that most of the daily minimum data for April to October 1927 exceed the current condition and  
201 finally the data during this period so were set to missing values. Even though, the quality of original  
202 daily maximum and minimum temperatures during 1890 - 2019 at Tianjin station is good, these checks  
203 provide a good foundation for the subsequent construction of a reliable homogenized daily series.

### 204 **3.2 Reference data**

205 Wu (2007) documented that although the earliest surface observation records at Tianjin station start with  
206 the year 1887, the observed daily maximum and minimum temperatures collected by Tianjin

207 Meteorological Archive began with September 1890 (Fig. 2). Therefore, some additional reference data  
208 sources are selected to extend the daily temperature series from January 1887 to August 1890 and  
209 lengthen the established daily temperature data to as early as possible. In addition, it is extremely  
210 important to establish an objective as well as a reasonable reference series for data homogenization. But  
211 due to non-availability of observation records and station metadata before 1950 especially for daily data,  
212 it is impossible to find a complete and reliable observed temperature series as a reliable reference series  
213 for Tianjin. Based on few recently reported studies (Li et al., 2020a; Lenssen et al., 2019; Xu et al., 2018;  
214 and Menne et al., 2018), we employ the station series or the interpolated temperature series using  
215 neighboring grid boxes from three global land surface temperature observation series (Table 2) as  
216 reference data sources for extension and establishment of reference data series used in data  
217 homogenization at Tianjin station. Plots of the ‘Tianjin’ station from all three series are shown in Figure  
218 3. The three global Land Surface Temperature (LSAT) are (1) Berkeley Earth land temperature  
219 (~~Berkeley Earth~~BE; Rohde et al., 2013; <http://berkeleyearth.org/data/>); (2) Climatic Research Unit (CRU)  
220 Time-Series (TS) version 4.03 (CRUTS4.03; Harris et al., 2020;  
221 [http://data.ceda.ac.uk/badc/cru/data/cru\\_ts/cru\\_ts\\_4.03/data/](http://data.ceda.ac.uk/badc/cru/data/cru_ts/cru_ts_4.03/data/)) and (3) Global Historical Climatology  
222 Network (GHCN) version3 (GHCNV3; Lawrimore et al., 2011;  
223 <https://www.ncdc.noaa.gov/ghcnd-data-access>).

224 The selected three LSAT are not independent as they likely use common input observations. The  
225 multiple datasets provides a variety of useful checks because they employ different ways of handling  
226 data problems such as incomplete spatial and temporal coverage and non-climatic influences on  
227 meteorological measurement (Hansen et al., 2010). As shown in Table 2, the three LSAT involve quality  
228 control and homogenization but using different methods. The records of ~~Berkeley Earth~~BE were usually

229 split into portions occurring before and after known and presumed discontinuities (e.g., from station  
230 relocation or instrument changes) without adjustment. For CRUTS4.03, most of these data have been  
231 adjusted, because the ultimate sources of most station records are from National Meteorological Services  
232 (NMSs), so China Meteorological Administration (CMA) for Tianjin. GHCNV3 station data used in this  
233 paper are the quality controlled and adjusted (QCA) data, which were produced by the developers of  
234 GHCN-Monthly. Two types of grid data, CRUTS4.03 and [Berkeley Earth](#) are both interpolated to the  
235 site level using the bilinear method.

236 From Table 2, only [Berkeley Earth](#)-daily maximum/minimum temperatures are available. So the  
237 maximum temperature [Berkeley Earth](#)-daily data corresponding to the site level Tianjin station is  
238 selected as the extension data for the period of Jan 1 1887-Aug 31 1890 (The specific information about  
239 extending the processing for this period is in supplemental material [S1-S3](#)), and the daily minimum  
240 series still begins with the date on Sep 1 1890 due to scarcity of reference data sources.

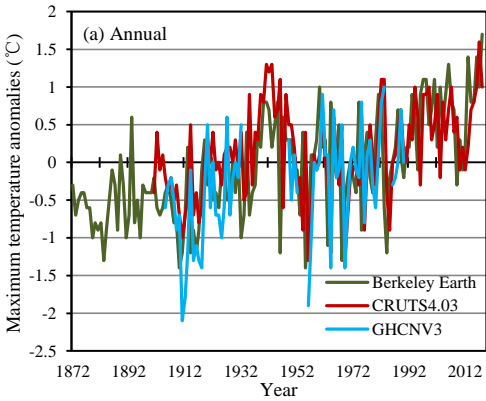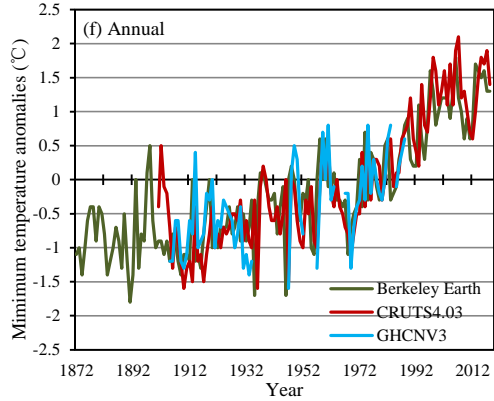

241

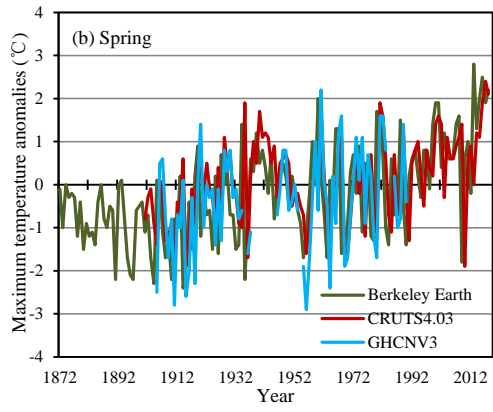

242

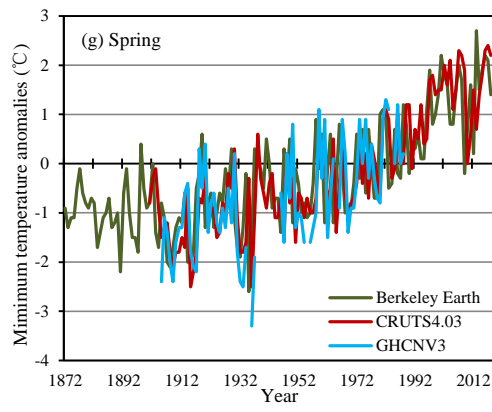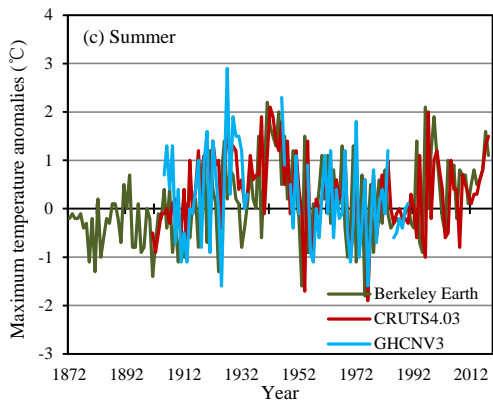

243

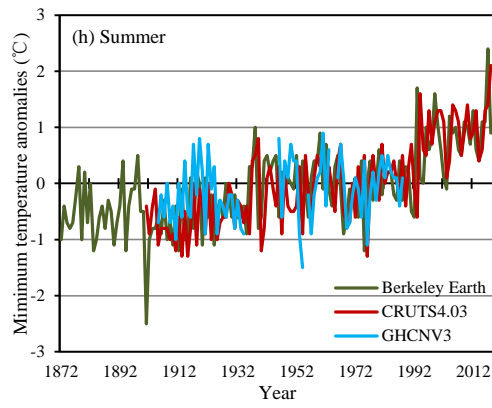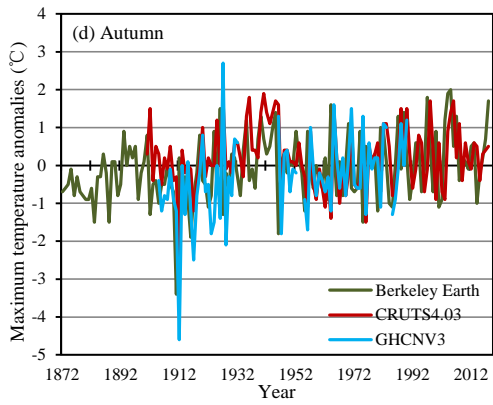

244

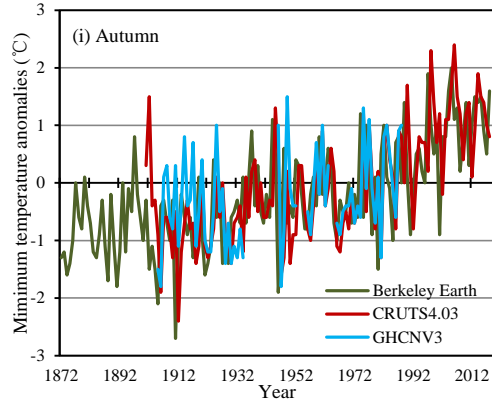

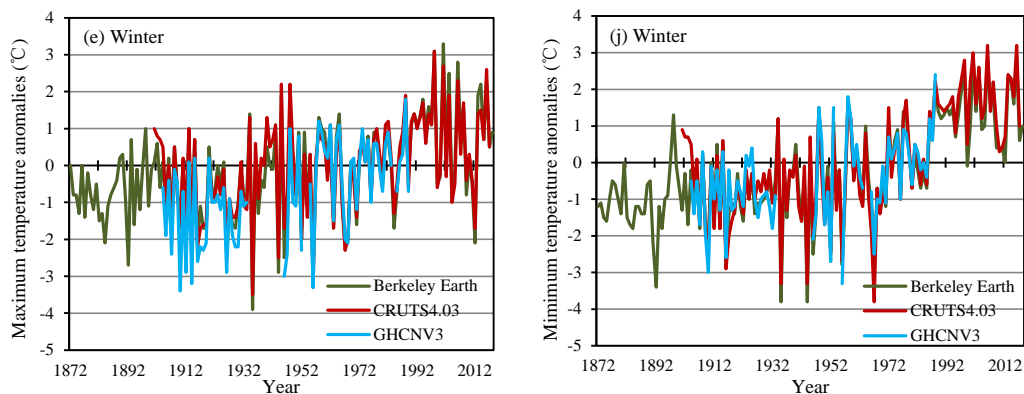

245

246 **Figure 3.** The annual and seasonal average anomalies of maximum (a-e) and minimum (f-j) temperatures based on the  
 247 interpolated series of ~~Berkeley Earth~~BE and CRUTS4.03 and the station series of GHCNV3 for Tianjin station ~~from~~  
 248 ~~1961–1990 base period.~~

249 **Table 2.** Information of reference data sources.

| Data sources                   | Monthly series | Daily series | Gridded data | Station data | Temporal resolution used here | Spatial                                     | Time periods                            | Units | Quality control | Adjustment |
|--------------------------------|----------------|--------------|--------------|--------------|-------------------------------|---------------------------------------------|-----------------------------------------|-------|-----------------|------------|
|                                |                |              |              |              |                               | resolutionGridded or station data used here | only for Tianjin in situ level          |       |                 |            |
| CRUTS4.03                      | √              | ×            | √            | √            | monthly                       | 0.5°×0.5° gridded                           | 1901.1-2018.12                          | °C    | √               | √          |
| <del>Berkeley</del> BE-monthly | √              | √            | √            | √            | monthly                       | 1°×1° gridded                               | 1872.12-2019.12                         | °C    |                 |            |
| <del>Earth</del> BE-daily      | √              | √            | √            | ×            | daily                         | 1°×1° gridded                               | Tmax1880.1-2018.12 / Tmin1903.1-2018.12 | °C    | √               | ×          |
| GHCNV3                         | √              | √            | √            | √            | monthly                       | station data                                | 1904.1-1990.12                          | °C    | √               | √          |

带格式的：左  
带格式的：字体：六号

250 **4 Construction of daily maximum and minimum temperature series from 1887 to 2019**

251 On the basis of the quality controlled and the extended series, the daily homogenized maximum and  
 252 minimum observation temperature series in Tianjin were constructed by means of the flow chart  
 253 illustrated in the dashed-box part of Fig. 4. Homogenization is an important step to eliminate the  
 254 discontinuities in observation records induced by non-climatic influences such as station relocation,  
 255 instrument change, observing time change and so on. Most importantly, the true characteristics of  
 256 climate change are preserved in this process (Quayle et al., 1991; Della-Marta and Wanner, 2006;  
 257 Haimberger et al., 2012; Rahimzadeh and Zavareh, 2014; Hewaarachchi et al., 2017).

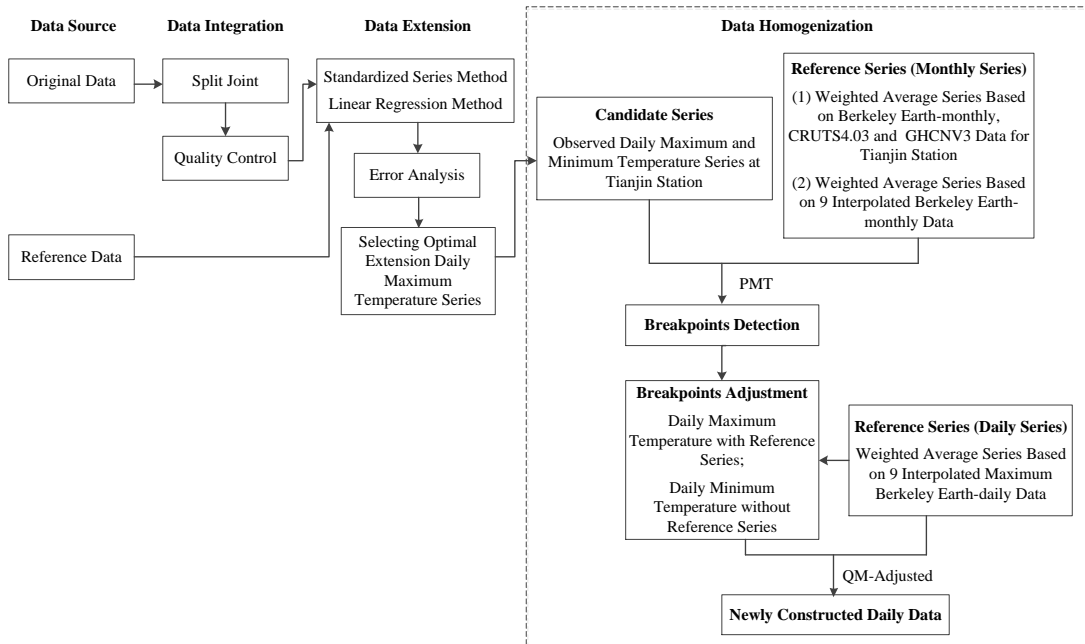

258

259 **Figure 4.** The flow chart of construction for century-long daily maximum and minimum temperature series in Tianjin.

260 **4.1 Establishment of the reference series**

261 In the process of homogenization, reasonable reference series plays an important role in the reliability of  
 262 the detected breakpoints. So in this section, we will establish monthly and daily reference series for the  
 263 maximum or minimum temperature series at Tianjin station and use them for breakpoint detection and  
 264 adjustment, respectively. Both reference series are established using a weighted average method. For  
 265 monthly reference series, we will establish two types in order to make the detected breakpoints more  
 266 reasonable and reliable. First, reference data are based on the combination of the interpolated  
 267 temperature series from ~~Berkeley Earth~~BE-monthly and CRUTS4.03 and station series from GHCNV3  
 268 data for Tianjin site (the three global LSAT datasets) and secondly based on the interpolated temperature  
 269 series from ~~Berkeley Earth~~BE-monthly data only. From the three LSAT data, the weight coefficients are  
 270 the square of the correlation coefficients between each LSAT and Tianjin's observed data. The daily



271 reference series we use is based on the interpolated temperature series from [Berkeley EarthBE](#)-daily data  
272 only.

273 In the case of the interpolated temperature series from [Berkeley EarthBE](#)-monthly or daily data only,  
274 the site level data are derived from the station network across the Beijing-Tianjin-Hebei area in China  
275 (Fig. 5). These stations are selected as follows: Firstly, the potential stations less than 300km at  
276 horizontal distances around Tianjin station and with altitude differences within 200m are chosen;  
277 Secondly, we will select 10 stations those are closest to Tianjin station using a spherical distance; Finally,  
278 9 stations are confirmed which are consistent between step 1 and step 2. In Figure 5 (the right), these 9  
279 are identified by green solid circles with black or red stars, [some metadata are also provided in Table 3.](#)  
280 Thus, the interpolated temperature series from [Berkeley EarthBE](#)-monthly or daily reference series are  
281 generated using the weighted average of the 9 stations. These weights are calculated as the square of  
282 correlation coefficients between the interpolated temperature series from [Berkeley EarthBE](#)-monthly or  
283 daily data for each 9 stations and Tianjin's observed data. Recall also that, the missing values in the  
284 original daily minimum temperature at Tianjin for April to October 1927 (checked in section 3.1) were  
285 replaced by the corresponding data from the weighted 9 interpolated temperature series from  
286 [BerkeleyBE](#)-daily data.

287 [Table 3. Metadata information of the 9 stations used to build reference series.](#)

| <a href="#">Station number</a> | <a href="#">Latitude</a> | <a href="#">Longitude</a> | <a href="#">Altitude (m)</a> | <a href="#">Surroundings</a> |
|--------------------------------|--------------------------|---------------------------|------------------------------|------------------------------|
| <a href="#">54517</a>          | <a href="#">39°04'</a>   | <a href="#">117°12'</a>   | <a href="#">2.2</a>          | <a href="#">urban</a>        |
| <a href="#">54518</a>          | <a href="#">39°07'</a>   | <a href="#">116°23'</a>   | <a href="#">9.0</a>          | <a href="#">rural</a>        |
| <a href="#">54526</a>          | <a href="#">39°05'</a>   | <a href="#">117°20'</a>   | <a href="#">1.9</a>          | <a href="#">urban</a>        |
| <a href="#">54528</a>          | <a href="#">39°14'</a>   | <a href="#">117°08'</a>   | <a href="#">3.4</a>          | <a href="#">rural</a>        |
| <a href="#">54530</a>          | <a href="#">39°13'</a>   | <a href="#">117°46'</a>   | <a href="#">0.5</a>          | <a href="#">rural</a>        |
| <a href="#">54619</a>          | <a href="#">38°55'</a>   | <a href="#">116°55'</a>   | <a href="#">5.5</a>          | <a href="#">urban</a>        |

|              |               |                |            |              |
|--------------|---------------|----------------|------------|--------------|
| <u>54622</u> | <u>38°57'</u> | <u>117°25'</u> | <u>1.5</u> | <u>rural</u> |
| <u>54623</u> | <u>39°03'</u> | <u>117°43'</u> | <u>4.8</u> | <u>urban</u> |

288

带格式的：缩进：首行缩进： 0 字符

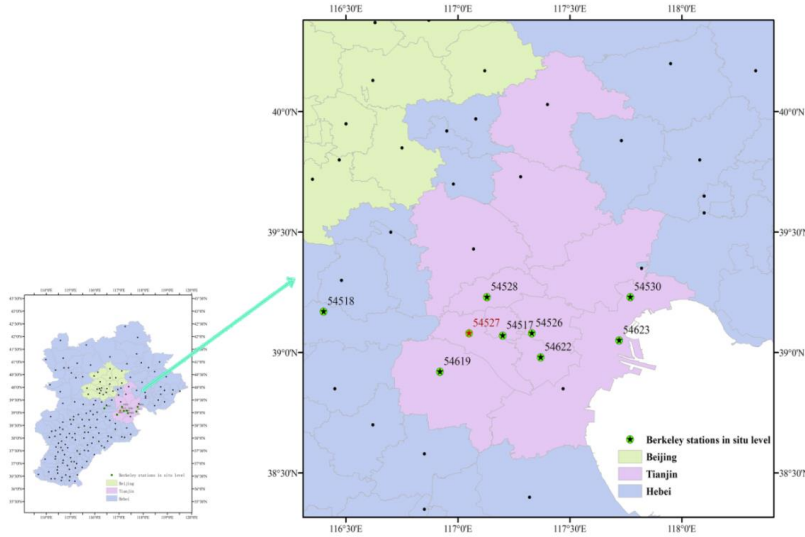

289

290 **Figure 5.** Geographical distribution of the surface observation-weather stations (black solid circles) at  
 291 Beijing-Tianjin-Hebei area in China and the selected 9 stations (green solid circles with black or red stars).

292 **4.2 Breakpoints detection and adjustment**

293 The RHtestsV4 software package is used to homogenize the daily maximum and minimum temperature  
 294 data at Tianjin station. The software consists of the Penalized Maximal T-test (PMT) (Wang et al., 2007)  
 295 and Quantile Matching (QM) adjustment (Wang et al., 2010; [Bai et al., 2020](#); [Lv et al., 2020](#)), both of  
 296 which are used to detect and adjust the known or presumed discontinuities. As observed in earlier  
 297 reported studies (Vincent, 2012; Trewin, 2013; Xu et al., 2013), homogenization at the daily timescales  
 298 is much more challenging than that at monthly or annual scales. Thus, firstly we test Tianjin’s monthly  
 299 observed maximum and minimum temperature series averaged from the daily ones to find the significant  
 300 breakpoints by means of PMT at the 5% significance level using two types of monthly reference series.  
 301 We then adjust the daily series at Tianjin station by QM-adjustment with or without the daily reference

302 series.

303 The breakpoints in the segment before 1921 are mainly determined by objective judgment from the  
304 same shifts at the two monthly timescales simultaneously due to the scarcity of station metadata. Those  
305 after 1921 are additionally assessed together with the station metadata and PMT detection at the 5%  
306 significance level. According to Table 1, we made a list containing some possibilities that could cause  
307 shifts in Tianjin's daily maximum and minimum temperature series (Fig. 2 vertical dashed lines). The  
308 date of Jan 1 1932 and Jan 1 1951 are connection points for different data sources, 1921, Jan 1 1955, Jan  
309 1 1992 and Jan 1 20~~100~~<sup>101</sup> indicate station relocations, and the others are the times of instrument and/or  
310 observing time change. However, due to statistical non-significance, those potential discontinuities are  
311 not considered as the final discontinuities (Fig. 6). So potential dates do not always cause artificial  
312 discontinuities at the joining of the three observation segments for daily maximum or minimum  
313 temperature series. Also all the instrument changes that happened for maximum and minimum series  
314 have also not introduced any significant shifts. In this regard, they do not look like the changes that  
315 happened with other networks around the world, such as the U.S. Cooperative Observer Program  
316 (COOP) network (Leeper et al., 2015). Moreover, different observing times (including automated  
317 observation system) also do not introduce any significant biases to the temperature time series, since the  
318 daily maximum and minimum temperatures are always recorded over a 24-hour observational window.  
319 Additionally, various versions of the surface meteorological observation specifications in China (e.g.  
320 versions of 1950, 1954, 1964, 1979 and 2003) imply that the observation principles of the highest and  
321 lowest thermometers are consistent, although there were a number of alterations of observing times.

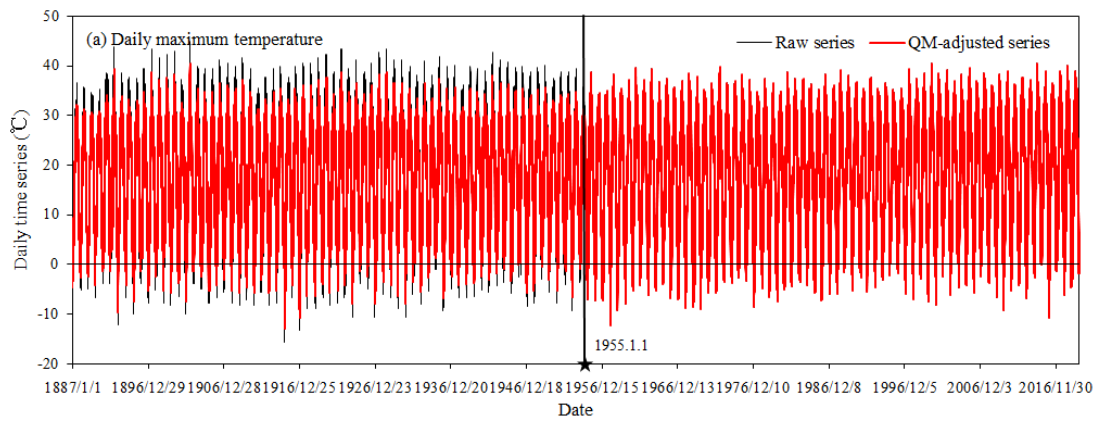

322

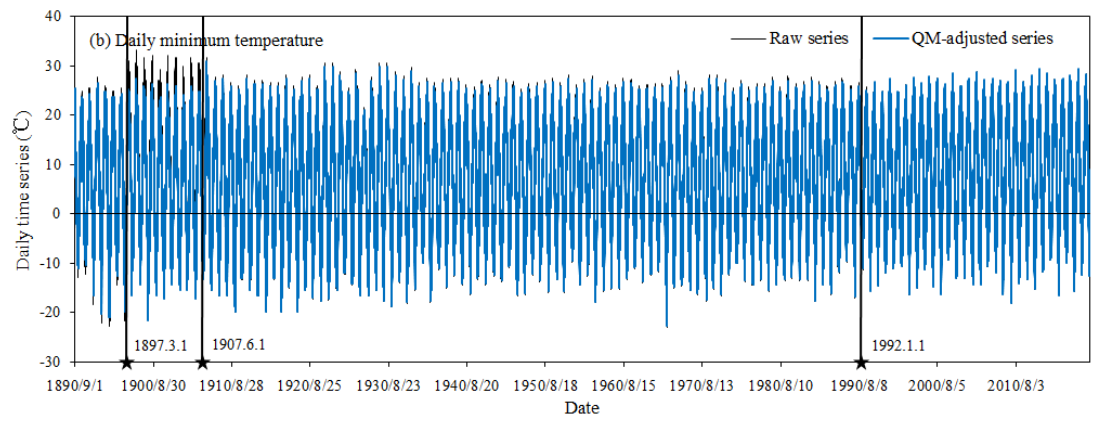

323

324 **Figure 6.** QM-adjusted and raw series (after quality control and extension) of daily maximum temperature (a) and  
 325 minimum temperature (b) at Tianjin meteorological observation station covering Jan 1 1887 (Sep 1 1890 for minimum)  
 326 to Dec 31 2019. Vertical solid lines demarcate the discontinuities at times Mar 1 1897, Jun 1 1907, Jan 1 1955 and Jan 1  
 327 1992.

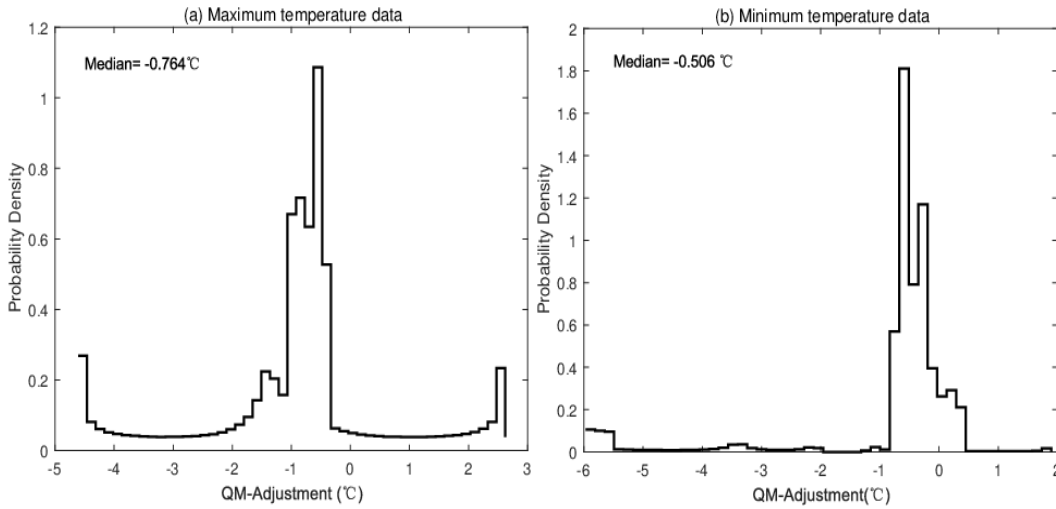

328  
329 **Figure 7.** The amplitudes of QM adjustment applied to daily maximum (a) and minimum (b) temperature data at  
330 Tianjin meteorological observation station.

331 **Table 34.** The average QM adjustments at the monthly timescales applied to daily maximum and minimum temperature  
332 data at Tianjin meteorological observation station (Units: °C).

|                     | Jan    | Feb    | Mar    | Apr    | May    | Jun    | Jul    | Aug    | Sep    | Oct    | Nov    | Dec    |
|---------------------|--------|--------|--------|--------|--------|--------|--------|--------|--------|--------|--------|--------|
| Maximum temperature | 1.136  | 0.246  | -0.616 | -0.687 | -1.322 | -2.484 | -2.817 | -2.285 | -1.046 | -0.590 | -0.582 | 0.566  |
| Minimum temperature | -0.105 | -0.297 | -0.634 | -0.979 | -1.084 | -1.090 | -1.207 | -1.184 | -1.050 | -0.951 | -0.624 | -0.317 |

333 Breakpoints in Mar 1 1897 and Jun 1 1907 are without metadata support, but those at Jan 1 1955  
334 and Jan 1 1992 are confirmed by metadata of station relocation. In Jan 1 1955 Tianjin meteorological  
335 station was relocated from No. 22 Ziyou Road to Zunyi Road, where is only 5km north of the original  
336 site, as well as being more open and clear, and in Jan 1 1992 it was relocated from Qixiangtai Road,  
337 Hexi District to Xidawa, Xiqing District (Table 1). The significant breakpoints are given in Fig. 6 as  
338 vertical solid lines.

339 The amplitudes of QM adjustment applied to each individual daily maximum and minimum  
340 temperature data are [-4.606, 2.621 °C] (Fig. 7a) and [-5.972, 1.897 °C] (Fig. 7b). The medians of QM

带格式的: 段落间距段前: 0 磅

341 adjustment are  $-0.764\text{ }^{\circ}\text{C}$  and  $-0.506\text{ }^{\circ}\text{C}$  respectively. As shown in Fig. 7, there are about 75% of  
342 adjustments are covering  $-2.5\sim 0.8\text{ }^{\circ}\text{C}$  in daily maximum series. For the minimum ones, there are about  
343 85% of adjustments are covering  $-0.8\sim 0.5\text{ }^{\circ}\text{C}$ . Table 3-4 provides the average amplitudes of QM  
344 adjustment at the monthly timescales. It shows that for the maximum data, the larger positive  
345 adjustments are mainly applied to series in January and December, while the larger negative adjustments  
346 are mainly in June, July and August. For the minimum data, all the average amplitudes of QM  
347 adjustment at the monthly timescales are negative, what is the same characteristic with the maximum  
348 ones, temperature series in the warm months (e.g. June, July and August) are adjusted with larger  
349 negative amplitudes, but smaller negative amplitudes for the series in the colder months (e.g. January,  
350 February and December).

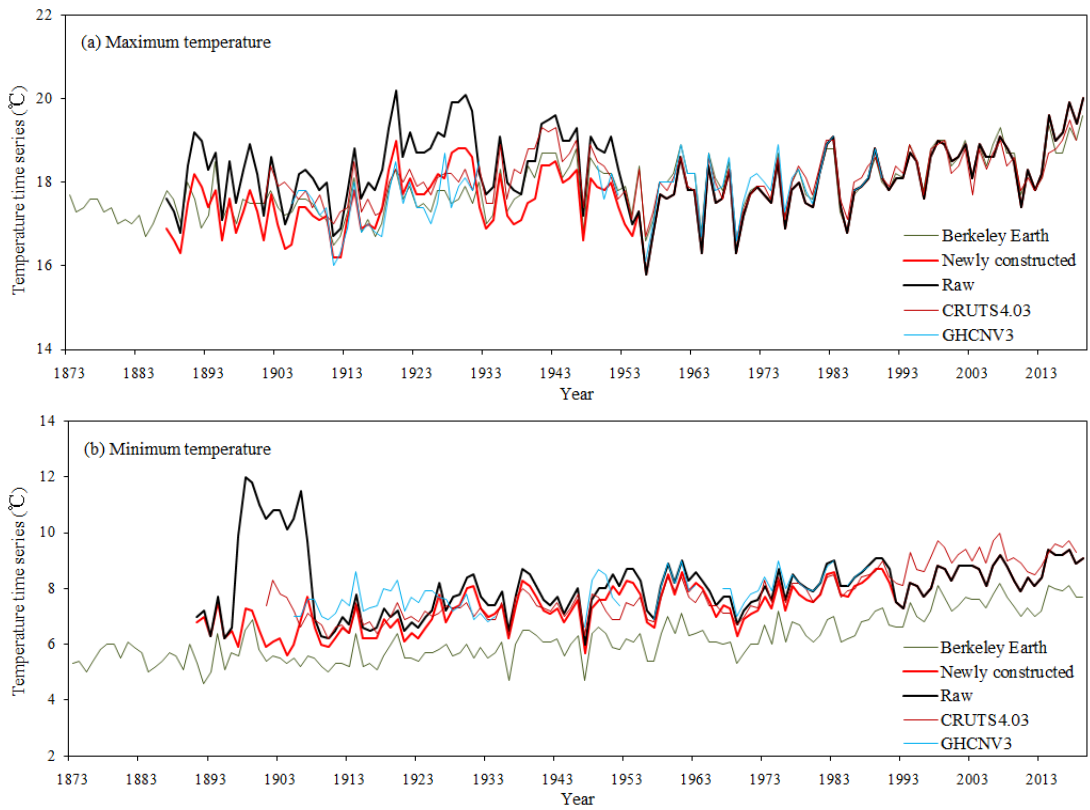

353 **Figure 8.** Annual average series of maximum (a) and minimum (b) temperatures in Tianjin from 1887 (1891 for  
 354 minimum) to 2019 based on newly constructed and raw daily data (after quality control and extension),  
 355 correspondingly with annual averaged data based on the interpolated series from [Berkeley-EarthBE](#)-monthly  
 356 (1873-2019) and CRUTS4.03 (1901-2018) and station series from GHCNV3 (1905-1990) for Tianjin station.

357 The average annual maximum and minimum temperature series based on the adjusted daily data  
 358 (the red lines) in Tianjin are given in Fig. 8. The raw time series for Tianjin (after quality control and  
 359 extension), the interpolated series from [Berkeley-EarthBE](#) and CRUTS4.03 and station series from  
 360 GHCNV3 for Tianjin station averaged from their monthly data are also displayed in Fig. 8. This shows  
 361 that the newly constructed time series has removed the large shifts in maximum and minimum  
 362 temperature series before 1955 and 1992 (Fig. 8 red lines) compared with the raw ones (Fig. 8 black  
 363 lines). Especially for the minimum data, the QM-adjustments have offset the shifts between 1896 and  
 364 1908 to the greatest extent. Meanwhile, the newly constructed temperature data has similar inter-annual  
 365 variability and trend changes compared to those of [Berkeley-EarthBE](#), CRUTS4.03 and GHCNV3  
 366 during the overlapping period.

367 **Table 45.** Definition of temperature extremes (Zhang et al., 2011). Days with maximum or minimum temperature above  
 368 the 90th and below the 10th percentiles are relative to the reference period of 1961 - 1990.

| Index | Description | Definition                                           | Units |
|-------|-------------|------------------------------------------------------|-------|
| TN10p | Cold nights | Days when daily minimum temperature <10th percentile | days  |
| TN90p | Warm nights | Days when daily minimum temperature >90th percentile | days  |
| TX10p | Cold days   | Days when daily maximum temperature <10th percentile | days  |
| TX90p | Warm days   | Days when daily maximum temperature >90th percentile | days  |

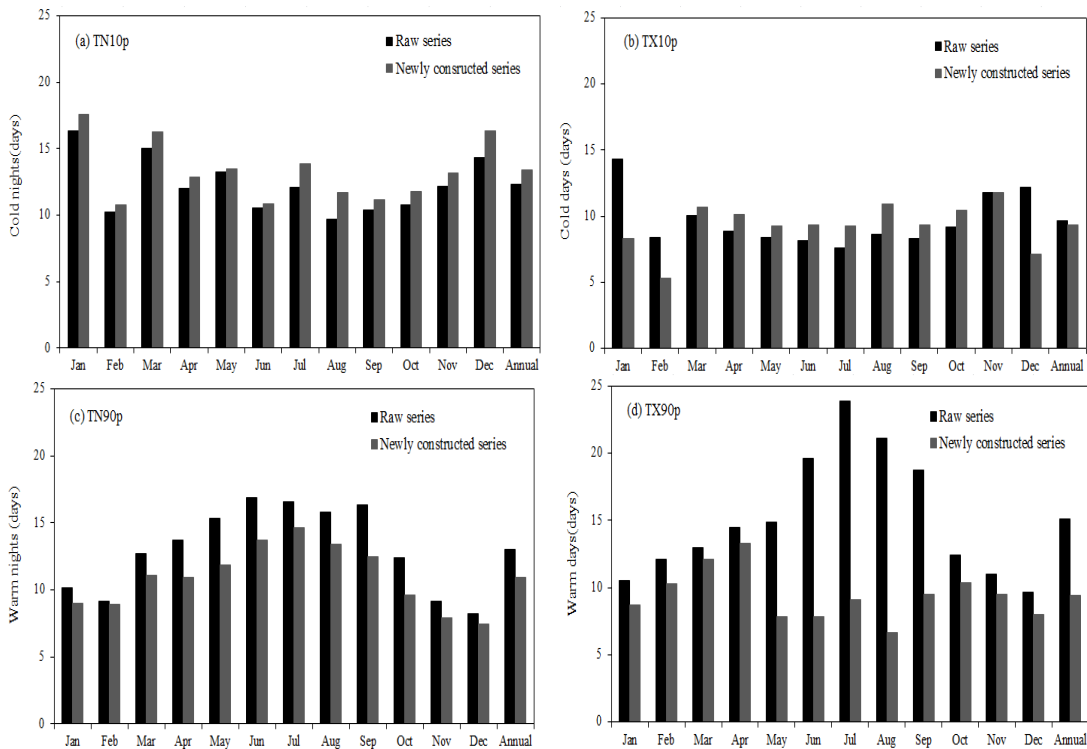

**Figure 9.** Annual and monthly temperature extremes of Cold nights (TN10p) (a), Cold days (TX10p) (b), Warm nights (TN90p) (c) and Warm days (TX90p) (d) for daily newly constructed and raw temperatures (after quality control and extension) in Tianjin.

Table 4-5 provides the definition of temperature extremes (Zhang et al., 2011). They are calculated based on the newly constructed and raw series (after quality control and extension) in Tianjin. As shown in Fig. 9, the number of TN10p (Fig. 9a) and TX10p (Fig. 9b) at the monthly timescales are increased by 0.3-2.0 days and 0.6-2.3 days based on the newly constructed series, especially in August they are increased by 2.0 and 2.3 days respectively. TX10p in cold months (January, February and December) from newly data are all less than those from the raw data, with the number of days decreased by 3.1-6.1. This is mainly due to large positive adjustments applied to daily maximum temperature in these months (Table 34). In the opposite sense, the number of TN90p (Fig. 9c) and TX90p (Fig. 9d) are decreased by 0.2-3.8 days and 0.9-14.8 days respectively based on the newly constructed series. The decreasing



383 numbers of the two indices between May and September are prominent, especially for TX90p from June  
 384 to August the number is decreased by 11.8-14.8 days. This is due to the large negative adjustments  
 385 applied to daily maximum temperature in these months (Table 34). The number of TN10p (Fig. 9a) from  
 386 newly constructed series at the annual timescales are increased by 1.1 days compared to the raw ones  
 387 while for TX10p (Fig. 9b), TN90p (Fig. 9c) and TX90p (Fig. 9d) are decreased by 0.3, 2.1 and 5.7 days  
 388 respectively.

## 389 5 The temperature change trend in Tianjin based on newly constructed series

### 390 5.1 Mean temperature trend during the last 130 years

391 **Table 56.** Comparisons between newly constructed surface air temperatures and previous assessments of the annual  
 392 trend change at the century-long scale in Tianjin with uncertainties at 95% significance level (Units: °C decade<sup>-1</sup>).

|                     | Newly constructed<br>1887(1891)-2019 | <del>Berkeley-EarthBE</del><br>(1873-2019) | CRUTS4.03<br>(1901-2018) |
|---------------------|--------------------------------------|--------------------------------------------|--------------------------|
| Maximum temperature | 0.119±0.015                          | 0.099±0.010                                | 0.062±0.015              |
| Minimum temperature | 0.194±0.013                          | 0.156±0.010                                | 0.217±0.015              |
| Mean temperature    | 0.154±0.013                          | 0.128±0.009                                | 0.140±0.013              |

393 ~~Table 5-6 indicates shows~~ that the annual trends of newly constructed maximum (1887-2019) and  
 394 minimum temperature (1891-2019) series in Tianjin are 0.119±0.015 °C decade<sup>-1</sup> and 0.194 ±0.013 °C  
 395 decade<sup>-1</sup>. Trend changes based on the newly constructed series are nearly consistent with those in  
 396 ~~Berkeley-EarthBE~~ and CRUTS4.03 on the century-long scale and these are 0.099±0.010 °C decade<sup>-1</sup> and  
 397 0.156±0.010 °C decade<sup>-1</sup>, 0.062±0.015 °C decade<sup>-1</sup> and 0.217±0.015 °C decade<sup>-1</sup> respectively. The trend of  
 398 the mean temperature for the newly constructed series (0.154±0.013 °C decade<sup>-1</sup>) is slightly larger than  
 399 those from the interpolated series from ~~Berkeley-EarthBE~~, CRUTS4.03, and Cao et al. (2013)  
 400 (0.128±0.009 °C decade<sup>-1</sup>, 0.140±0.013 °C decade<sup>-1</sup>, and 0.098±0.017 °C decade<sup>-1</sup>, respectively). ~~The~~

average temperature trend changes from the newly constructed series are much closer to internationally authoritative data calculations, so they are more consistent. Moreover, annual trend change in mean temperature based on the newly constructed series in at Tianjin is similar also a little larger than that for over the whole China (Li et al., 2020e2020b), which are  $0.130 \pm 0.009$  °C decade<sup>-1</sup>,  $0.114 \pm 0.009$  °C decade<sup>-1</sup> and  $0.121 \pm 0.009$  °C decade<sup>-1</sup> respectively from CRUTEM4, GHCNV3 and C-LSAT (during 1900 - 2017). It conforms to the underlying changes across China. Increasing trends in northern China are more prominent than those from other regions in mainland China (Li et al., 2004; Zhai et al., 2004).

## 5.2 Extreme events change trend during the last 130 years

**Table 67.** Trends in annual and seasonal temperature extremes of Cold nights (TN10p), Cold days (TX10p), Warm nights (TN90p) and Warm days (TX90p) for daily newly constructed temperatures in Tianjin (Units: d decade<sup>-1</sup>).

|        | TN10p   | TX10p   | TN90p  | TX90p  |
|--------|---------|---------|--------|--------|
| Annual | -1.454* | -0.140* | 1.196* | 0.975* |
| Spring | -1.861* | -0.508* | 1.423* | 0.959* |
| Summer | -1.483* | -0.213* | 1.443* | 1.474* |
| Autumn | -0.798* | -0.221* | 0.724* | 0.621* |
| Winter | -1.555* | 0.421*  | 1.119* | 0.850* |

The asterisks indicate trend changes are significant at the 5% level. The annual time periods of TN10p and TN90p cover the 1891-2019 period, TX10p and TX90p cover 1887-2019. The time periods of TN10p and TN90p in spring and summer cover 1891-2019, those in autumn and winter 1890-2019 (winter ending in 2018), and TX10p and TX90p in four seasons all cover 1887-2019 (winter ending in 2018).

Table 67 indicates illustrates that trends of temperature extremes based on the newly constructed series are all significant at the 5% level and have much more coincident changes. The cold extremes (TN10p and TX10p) at annual and seasonal timescales express significantly decreasing trends (except for TX10p in winter), while the warm extremes (TN90p and TX90p) show increasing trends. Trends of TN10p, TX10p, TN90p and TX90p at the annual timescales are  $-1.454$  d decade<sup>-1</sup>,  $-0.140$  d decade<sup>-1</sup>,  $1.196$  d

decade<sup>-1</sup> and 0.975 d decade<sup>-1</sup>, all passed the significance test at the 5% level. For the seasonal change, the negative trends of TN10p and TX10p in spring are the largest, reaching up to trends of TN10p and TX10p in spring are the largest. They are -1.861 d decade<sup>-1</sup> and -0.508 d decade<sup>-1</sup> during the past 130 years. For TN90p and TX90p is in summer, with the amplitude of 1.443 d decade<sup>-1</sup> and 1.474 d decade<sup>-1</sup>.

## 6 Data availability

The newly homogenized daily surface air temperature for Tianjin city over century-long scales are published at PANGAEA (<https://doi.pangaea.de/10.1594/PANGAEA.924561>, last access: 10 November 2020) under the DOI <https://doi.pangaea.de/10.1594/PANGAEA.924561> (Si and Li, 2020). The dataset contain the maximum, minimum and mean temperature time series before and after adjustment as well as new estimates of average and extreme temperature trend change in Tianjin for the period of 1887-2019.

## 7 Conclusions and discussion

This paper documents the various procedures necessary to construct a homogenized daily maximum and minimum temperature series since 1887 for Tianjin. These same-similar procedures could and should be used for other sufficiently long and complete series across the world. The newly constructed data have reduced non-climatic errors at the daily timescale, improved the accuracy and enhanced the real climate representation of average and extreme temperature over century-long scales.

Three sources of surface observation daily data collected by the Tianjin Meteorological Archive have been integrated viz., Department of Industry Agency of British Concession in Tianjin covering Sep 1 1890-Dec 31 1931, Water Conservancy Commission of North China covering Jan 1 1932-Dec 31 1950, and monthly journal sheets of Tianjin surface meteorological observation records covering Jan 1 1951-Dec 31 2019. These three have provided a good foundation for the construction of reliable

442 homogenized daily series by quality control of climatic range checks, climatic outlier checks and  
443 internal consistency checks. Data extension has been undertaken in the interest of extending the length  
444 of the series as far back as possible, but it is carried out only for the daily maximum series due to length  
445 limitation of reference daily data.

446 Using the integration, quality control and extension, we detected and adjusted the statistically  
447 significant breakpoints in the daily maximum and minimum temperature time series from an objective  
448 perspective based on multiple reference series and statistical characteristics from homogenization  
449 detection by means of PMT as well as sophisticated manual data processing. This temperature series  
450 provides a set of new baseline data for the field of extreme climate change over the century-long scale  
451 and a reference for construction of other long-term reliable daily time series in the region. The annual  
452 trends of newly constructed maximum and minimum temperature in Tianjin are  $0.119 \pm 0.015^{\circ}\text{Cdecade}^{-1}$   
453 and  $0.194 \pm 0.013^{\circ}\text{Cdecade}^{-1}$  over the last 130 years, which are similar to those from Berkeley and  
454 CRUTS4.03. The trend of mean temperature averaged from the new series is  $0.154 \pm 0.013^{\circ}\text{Cdecade}^{-1}$ ,  
455 which is of the same order as those over the whole China (Li et al., 2020a; ~~2020e~~2020b). The new daily  
456 data also show improvements over the archived datasets for trend analyses of extremes. The trends in  
457 TN10p, TX10p, TN90p and TX90p are all significant at the 5% level, and they give a much more  
458 consistent set of trends. To some extent, changes in climate extremes can be analyzed with higher  
459 confidence using the newly constructed daily data in this paper.

460 However, in the current study, there may be some systematic biases (possibly some potential  
461 breakpoints missed) still in the adjusted time series, since metadata of Tianjin station are not consistently  
462 available in the climatological archives over the whole century as well as not being documented during  
463 the period before 1921. Climate data homogenization does not always follow a consistent pattern (Si et

464 al., 2018; 2019). It is necessary to constantly improve the existing methodology and explore new  
465 techniques in order to obtain reliable homogenized data products. Accordingly, future work should  
466 involve more detailed station metadata and more advanced data processing techniques to produce much  
467 better daily datasets over century scales.

468 **Author contributions.** QL designed and implemented the dataset construction. PS collected the basic  
469 and reference data sources, constructed the dataset and written the paper. QL, PS and PJ all contributed  
470 to data analysis, discussion and writing of the paper.

471 **Competing interests.** The authors declare that they have no conflict of interest.

472 **Acknowledgements.** We thank the many people and /or institutions who contributed to the construction  
473 of this dataset.

474 **Financial support.** This research has been supported by National Natural Fund projects No. 41905132  
475 and No. 41975105.

## 476 **References**

477 [Bai, K. X., Li, K., Wu, C. B., Chang, N. B., and Guo, J. P.: A homogenized daily in situ PM2.5](#)  
478 [concentration dataset from the national air quality monitoring network in China, \*Earth Syst. Sci. Data\*,](#)  
479 [12\(4\): 3067-3080, <https://doi.org/10.5194/essd-12-3067-2020>, 2020.](#)

480 Cao, L. J., Yan, Z. W., Zhao, P., Zhu, Y. N., Yu, Y., Tang, G. L., and Jones P.: Climatic warming in China  
481 during 1901-2015 based on an extended dataset of instrumental temperature records, *Environ. Res.*  
482 *Lett.*, 12(6): 064005, <https://doi.org/10.1088/1748-9326/aa68e8>, 2017.

483 Della-Marta, P. M., and Wanner, H.: A method of homogenizing the extremes and mean of daily  
484 temperature measurements, *J. Climate*, 19(17): 4179-4197, <https://doi.org/10.1175/JCLI3855.1>, 2006.

485 Dienst, M., Lindén, J., Engström, E., and Esper, J.: Removing the relocation bias from the 155-year  
486 Haparanda temperature record in Northern Europe, *Int. J. Climatol.*, 37(11): 4015-4026, [https://](https://doi.org/10.1002/joc.4981)  
487 [doi.org/10.1002/joc.4981](https://doi.org/10.1002/joc.4981), 2017.

488 Hansen, J., Ruedy, R., and Sato Makiko K. Lo.: Global surface temperature change, *Rev. Geophys.*, 48,  
489 RG4004, <https://doi.org/10.1029/2010RG000345>, 2010.

490 Haimberger, L., Tavolato, C., Sperka, S.: Homogenization of the global radiosonde temperature dataset  
491 through combined comparison with reanalysis background series and neighboring stations, *J. Climate*,  
492 25(23): 8108-8131, [https:// doi.org/10.1175/JCLI-D-11-00668.1](https://doi.org/10.1175/JCLI-D-11-00668.1), 2012.

493 Hewarachi, A. P., Li, Y. G., Lund, R., and Rennie, J.: Homogenization of Daily Temperature Data, *J.*  
494 *Climate*, 30, 985-999, [https:// doi.org/10.1175/JCLI-D-16-0139.1](https://doi.org/10.1175/JCLI-D-16-0139.1), 2017.

495 Huang, J. Y., Liu, X. N., Li, Q. X.: The experimental study of reconstruction for summer precipitation  
496 and temperature in China, *Journal of Applied Meteorological Science*, 15(2): 200-206, 2004(in  
497 Chinese).

498 IPCC: Climate Change 2013: The Physical Science Basis. Contribution of Working Group I to the Fifth  
499 Assessment Report of the Intergovernmental Panel on Climate Change, Stocker TF, Qin D, Plattner G  
500 K, TignorM, Allen SK, Boschung J, Nauels A, Xia Y, Bex V, Midgley PM. (eds.): 1535 pp. Cambridge  
501 University Press: Cambridge, UK 25 and New York, NY, 2013.

502 Jones, P. D., Lister, D., Osborn, T. J., Harpham, C., Salmon, M., and Morice C.: Hemispheric and  
503 large-scale land-surface air temperature variations: an extensive revision and an update to 2010, *J.*  
504 *Geophys. Res.*, 117, D05127, [https:// doi.org/10.1029/2011JD017139](https://doi.org/10.1029/2011JD017139), 2012.

505 Lawrimore, J. H., Menne, M. J., Gleason, B., Williams, C. N., Wuertz, D. B., Vose, R. S., and Rennie, J.:  
506 An overview of the Global Historical Climatology Network monthly mean temperature data set,

507 Version 3, *J. Geophys. Res.*, 116, D19, <https://doi.org/10.1029/2011JD016187>, 2011.

508 Leeper, R. D., Rennie, J., Palecki, M. A.: Observation perspectives from U.S. Climate Reference  
509 Network (USCRN) and Cooperative Observer Program (COOP) Network: temperature and  
510 precipitation comparison, *J. Atmos. Oceanic Technol.*, 32(4): 703-721,  
511 <https://doi.org/10.1175/JTECH-D-14-00172.1>, 2015.

512 Lenssen, N. J. L., Schmidt, G. A., Hansen, J., Menne, M. J., Persin, A., Ruedy, R., and Zyss, D.:  
513 Improvements in the GISTEMP uncertainty model, *J. Geophys. Res.*, 124(12): 6307-6326,  
514 <https://doi.org/10.1029/2018JD029522>, 2019.

515 Li, Q. X., Sun, W. B., Huang, B. Y., Dong, W. J., Wang, X. L., Zhai, P. M., and Jones, P.: Consistency of  
516 global warming trends strengthened since 1880s, *Science Bulletin*,  
517 <https://doi.org/10.1016/j.scib.2020.06.009>, 2020a.

518 Li, Q. X., Sun, W. B., Huang, B. Y., Dong, W. J., Wang, X. L., Zhai, P. M., and Jones, P.: An updated  
519 evaluation on the global Mean Surface Temperature trends since the start of 20th century, *Climate*  
520 *Dynamics*, [56:635-650](https://doi.org/10.1007/s00382-020-05502-0), <https://doi.org/10.1007/s00382-020-05502-0>, 2021, ~~in review~~, 2020b.

521 Li, Q. X., Dong, W. J., and Jones, P.: Continental Scale Surface Air Temperature Variations: Experience  
522 Derived from the Chinese Region, *Earth-Science Reviews*, 200, 102998,  
523 <https://doi.org/10.1016/j.earscirev.2019.102998>, ~~2020~~2020b.

524 Li, Q. X., Zhang, L., Xu, W. H., Zhou, T. J., Wang, J. F., Zhai, P. M., and Jones, P.: Comparisons of time  
525 series of annual mean surface air temperature for China since the 1900s: Observation, Model  
526 simulation and extended reanalysis, *Bull. Amer. Meteor. Soc.*, 98(4):699-711, [https://doi.org/](https://doi.org/10.1175/BAMS-D-16-0092.1)  
527 [10.1175/BAMS-D-16-0092.1](https://doi.org/10.1175/BAMS-D-16-0092.1), 2017.

528 Li, Q. X., Dong, W. J., Li, W., Gao, X. R., Jones P., Parker D., and Kennedy J.: Assessment of the

529 uncertainties in temperature change in China during the last century, *Chin. Sci. Bull.* 55(19):  
530 1974-1982, <https://doi.org/10.1007/s11434-010-3209-1>, 2010.

531 [Li, Q. X., Zhang, H. Z., Liu, X. N., and Huang, J. Y.: Urban heat island effect on annual mean](#)  
532 [temperature during the last 50 years in China, \*Theor. Appl. Climatol.\*, 79, 165-174,](#)  
533 <https://doi.org/10.1007/s00704-004-0065-4>, 2004.

534 Li, Y., Tinz, B., Storch, H., Wang, Q. Y., Zhou, Q. L., and Zhu, Y. N.: Construction of a surface air  
535 temperature series for Qingdao in China for the period 1899 to 2014, *Earth Syst. Sci. Data*, 10(1):  
536 643-652, <https://doi.org/10.5194/essd-10-643-2018>, 2018.

537 [Lv, Y. M., Guo, J. P., Yim, S. H., Yun, Y. X., Yin, J. F., Liu, L., Zhang, Y., Yang, Y. J., Yan, Y., and Chen,](#)  
538 [D. D.: Towards understanding multi-model precipitation predictions from CMIP5 based on China](#)  
539 [hourly merged precipitation analysis data, \*Atmos. Res.\*, 231\(1\): 104671,](#)  
540 <https://doi.org/10.1016/j.atmosres.2019.104671>, 2020.

541 Menne, M. J., Durre, I., Vose, R. S., Gleason, B., and Houston, T. G.: An overview of the global  
542 historical climatology network-daily database, *J. Atmos. Ocean. Technol.*, 29(7): 897-910,  
543 <https://doi.org/10.1175/JTECH-D-11-00103.1>, 2012.

544 Menne, M. J., Williams, C. N., Gleason B. E., Rennie J. J., and Lawrimore, J. H.: The global historical  
545 climatology network monthly temperature dataset, Version4, *J. Climate*, 31(24): 9835-9854,  
546 <https://doi.org/10.1175/JCLI-D-18-0094.1>, 2018.

547 Png, I. P. L., Chen, Y., Chu, J. H., Feng Y. K., Lin, E. K. H., and Tseng W. L.: Temperature, precipitation  
548 and sunshine across China, 1912-51: A new daily instrumental dataset, *Geosci. Data J.*, 1-13,  
549 <https://doi.org/10.1002/gdj3.91>, 2020.

550 Quayle, R. G., Easterling, D. R., Karl T. R., Hughes, P. Y.: Effects of recent thermometer changes in the

带格式的: 缩进: 左侧: 0 厘米,  
首行缩进: 0 字符

带格式的: 缩进: 左侧: 0 厘米,  
首行缩进: 0 字符



551 cooperative station network, *Bull. Amer. Meteor. Soc.*, 72(11):1718-1723,  
552 [https://doi.org/10.1175/1520-0477\(1991\)0722.0.CO;2](https://doi.org/10.1175/1520-0477(1991)0722.0.CO;2), 1991.

553 Rahimzadeh, F., and Zavareh, M. N.: Effects of adjustment for non-climatic discontinuities on  
554 determination of temperature trends and variability over Iran, *Int. J. Climatol.*, 34(6): 2079-2096,  
555 <https://doi.org/10.1002/joc.3823>, 2014.

556 Rohde, R., Muller, R. A., Jacobsen, R., Muller, E., Perlmutter, S., Rosenfeld, A., Wurtele J., Groom, D.,  
557 and Wickham, C.: A new estimate of the average earth surface land temperature spanning 1753 to  
558 2011, *Geoinfor. Geostat: An overview*, 1, <https://doi.org/10.4172/2327-4581.1000101>, 2013.

559 Si, P., Zheng, Z. F., Ren, Y., Liang, D. P., Li, M. C., and Shu, W. J.: Effects of urbanization on daily  
560 temperature extremes in North China, *J. Geogr. Sci.*, 24(2): 349-362, [https://doi.org/](https://doi.org/10.1007/s11442-014-1092-4)  
561 [10.1007/s11442-014-1092-4](https://doi.org/10.1007/s11442-014-1092-4), 2014.

562 Si, P., Hao, L. S., Luo, C. J., Cao, X. C., and Liang, D. P.: The interpolation and homogenization of  
563 long-term temperature time series at Baoding observation station in Hebei Province, *Climate Change*  
564 *Research*, 13(1): 41-51, 2017 (in Chinese).

565 Si, P., Luo, C. J., and Liang, D. P.: Homogenization of Tianjin monthly near-surface wind speed using  
566 RHtestsV4 for 1951-2014, *Theor. Appl. Climatol.*, 132 (3-4): 1303-1320, [https://doi.org/](https://doi.org/10.1007/s00704-017-2140-7)  
567 [10.1007/s00704-017-2140-7](https://doi.org/10.1007/s00704-017-2140-7), 2018.

568 Si, P., Luo, C. J., and Wang, M.: Homogenization of Surface Pressure Data in Tianjin, China, *J. Meteor.*  
569 *Res.*, 33(6): 1131-1142, <https://doi.org/10.1007/s13351-019-9043-8>, 2019.

570 Si, P., Wang, J., Li, H. J., and Nian, F. X.: Homogenization and application of meteorological  
571 observation data at provincial level. Beijing: China Meteorological Press, 76-91, 2020(in Chinese).

572 Si, P., and Li, Q. X.: Tianjin homogenized daily surface air temperature over century-long scale.

573 PANGAEA, <https://doi.pangaea.de/10.1594/PANGAEA.924561>, 2020.

574 Sun, X. B., Ren, G. Y., Xu, W. H., Li, Q. X., and Ren, Y. Y.: Global land-surface air temperature change  
575 based on the new CMA GLSAT data set, *Science Bulletin*, 62(4): 236-238,  
576 <http://doi.org/10.1016/j.scib.2017.01.017>, 2017.

577 Trewin, B.: A daily homogenized temperature data set for Australia, *Int. J. Climatol.*, 33(6): 1510-1529,  
578 <http://doi.org/10.1002/joc.3530>, 2013.

579 Harris, I. C., Jones, P. D. CRU TS4.03: Climatic Research Unit (CRU) Time-Series (TS) version 4.03 of  
580 high-resolution gridded data of month-by-month variation in climate (Jan. 1901- Dec. 2018). Centre  
581 for Environmental Data Analysis, 22, <http://doi.org/10.5285/10d3e3640f004c578403419aac167d82>,  
582 2020.

583 Vincent, L. A., Wang, X. L., Milewska, E. J., Wan, H. Yang, F., and Swail, V. R.: A second generation of  
584 homogenized Canadian monthly surface air temperature for climate trend analysis, *J. Geophys. Res.*,  
585 117, D18110, <http://doi.org/10.1029/2012JD017859>, 2012.

586 Vincent, L. A., Zhang, X., Bonsal, B. R., and Hogg, W. D.: Homogenization of daily temperature over  
587 Canada, *J. Climate*, 15:1322-1334, [http://doi.org/10.1175/1520-0442\(2002\)0152.0.CO;2](http://doi.org/10.1175/1520-0442(2002)0152.0.CO;2), 2002.

588 Wang, S. W., Ye, J. L., Gong, D. Y., Zhu, J. H., and Yao, T. D.: Construction of mean annual temperature  
589 series for the LSAT one hundred years in China, *Quarterly Journal of Applied Meteorology*, 9(4):  
590 392-401, 1998(in Chinese).

591 Wang, S. W., Gong, D. Y., Ye, J. L., and Chen, Z. H.: Seasonal precipitation series of Eastern China  
592 since 1880 and the variability, *Acta Geographica Sinica*, 35(3): 281-293, 2000 (in Chinese).

593 Wang, X. L., Wen, Q. H., and Wu Y. H.: Penalized maximal t test for detecting undocumented mean  
594 change in climate data series, *J. Appl. Meteor. Climatol.*, 46, 916-931, <http://>

595 [doi.org/10.1175/JAM2504.1](https://doi.org/10.1175/JAM2504.1), 2007.

596 Wang, X. L., Chen, H. F., Wu, Y. H., Feng, Y., and Pu, Q.: New techniques for the detection and  
597 adjustment of shifts in daily precipitation data series, *J. Appl. Meteor. Climatol.*, 49, 2416-2436,  
598 [http:// doi.org/10.1175/2010jamc2376.1](http://doi.org/10.1175/2010jamc2376.1), 2010.

599 Wu, Z. X.: *China Modern Meteorological Station*. Beijing: China Meteorological Press, 180-182, 2007  
600 (in Chinese).

601 Xu, C. D., Wang, J. F., and Li, Q. X.: A new method for temperature spatial interpolation based on sparse  
602 historical stations, *J. Climate*, 31(5): 1757-1770, [http:// doi.org/10.1175/JCLI-D-17-0150.1](http://doi.org/10.1175/JCLI-D-17-0150.1), 2018.

603 Xu, W. H., Li, Q. X., Jones, P., Wang, X. L., Trewin, B., Yang, S., Zhu, C., Zhai, P. M., Wang, J. F.,  
604 Vincent, L. A., Dai, A. G., Gao, Y., and Ding, Y. H.: A new integrated and homogenized global  
605 monthly land surface air temperature dataset for the period since 1900, *Clim. Dynam.*, 50(15):  
606 2513-2536, [http:// doi.org/10.1007/s00382-017-3755-1](http://doi.org/10.1007/s00382-017-3755-1), 2018.

607 Xu, W. Q., Li, Q. X., Wang, X. L., Yang, S., Cao, L. J., and Feng, Y.: Homogenization of Chinese daily  
608 surface air temperatures and analysis of trends in the extreme temperature indices, *J. Geophys. Res.*  
609 *Atmos.*, 118, [http:// doi.org/10.1002/jgrd.50791](http://doi.org/10.1002/jgrd.50791), 2013.

610 Yan, Z. W., Chi, Y., and Jones, P.: Influence of inhomogeneity on the estimation of mean and extreme  
611 temperature trends in Beijing and Shanghai, *Adv. Atmos. Sci.*, 18(3): 309-322, [http://](http://doi.org/10.1007/BF02919312)  
612 [doi.org/10.1007/BF02919312](http://doi.org/10.1007/BF02919312), 2001.

613 Yu, J., Li, Q. X., Zhang, T. W., Xu, W. H., Zhang, L., and Cui, Y.: The merging test using measurements,  
614 paleoclimate reconstruction and climate model data based on Bayesian model, *Acta Meteorologica*  
615 *Sinica*, 76(2): 304-314, 2018(in Chinese).

616 Zhang, X., Alexander, L., Hegerl, G.C., Jones, P.D., Klein Tank, A., Peterson, T.C., Trewin, B. and

617 Zwiers, F.W.: Indices for monitoring changes in extremes based on daily temperature and precipitation  
618 data. WIREs Climate Change, 2, 851-870, [http:// doi.org/10.1002/wcc/147](http://doi.org/10.1002/wcc/147), 2011.

619 Zheng, J. Y., Liu, Y., Ge Q. S., Hao, Z. X.: Spring phenodate records derived from historical documents  
620 and reconstruction on temperature change in Central China during 1850-2008, Acta Geographica  
621 Sinica, 70(5): 696-704, 2015(in Chinese).

622 [Zhai., P. M., Chao., Q. C., and Zou., X. K.: Progress in China's climate change study in the 20th century,](#)  
623 [J. Geograph. Sci., 14\(1\): 3-11, <https://doi.org/10.1007/BF02841101>, 2004.](#)
